# Supplementary material for: Enhancing CO2 Electroreduction Precision to Ethylene and Ethanol: The Role of Additional Boron Catalytic Sites in Cu-Based Tandem Catalysts
Source: Research Square preprint supplement (doi:10.21203/rs.3.rs-3518899/v1), 2023-11-07
Supplement: Supplementary file 1 [file c0de9e6826bfa3b20260a438.docx]

Supplementary Information

**Enhancing CO2 Electroreduction Precision to Ethylene and Ethanol: The Role of Additional Boron Catalytic Sites in Cu-Based** **Tandem Catalysts**

Fuqing Yu1, Minxing Shu1, Guangyao Zhang1, Qiming Yu1, Guomin Xia2, Hongming Wang1,2*

1College of Chemistry and Chemical Engineering and 2Institute for Advanced Study

Nanchang University

Nanchang 330031, China

E-mail: [hongmingwang@ncu.edu.cn](mailto:hongmingwang@ncu.edu.cn)

**Chemicals**

Cupric chloride (CuCl2·H2O, purity>99%), Sodium borohydride (NaBH4, >99%), Methanol (CH3OH), ethanol, potassium bicarbonate (KHCO3, ≥99.5%), Nickel acetate tetrahydrate (Ni(OAc)2·4H2O, ≥99.5%), triethylamine, sodium citrate (>99%), Hydrochloric acid (HCl, vol%>37%) were purchased from China National Medicines Corporation Ltd. 1,2,4,5-benzenetetramine hydrochloride, 1,3,5-trimethylbenzene were purchased from Shanghai Aladdin Bio-Chem Technology Co., LTD. All chemicals were used without further purification.

All materials were used directly with no further purification. Milli-Q (DI) water (>18.0 MΩ) was purified with a Sartorius arium mini ultrapure water system.


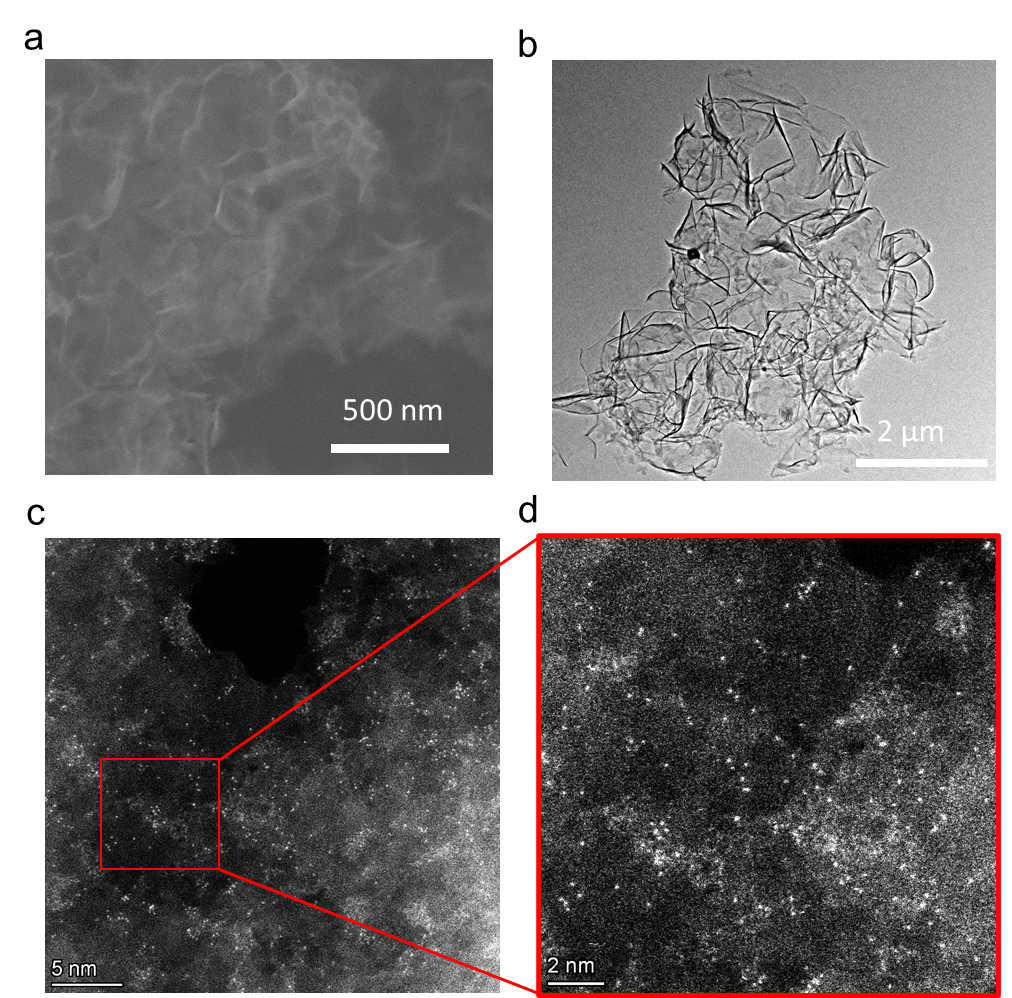


Figure S1 . a) SEM , b)TEM and c) HADDF-TEM images of Ni-SAC. d) Magnified HADDF-TEM images of Ni atomic dispersion.


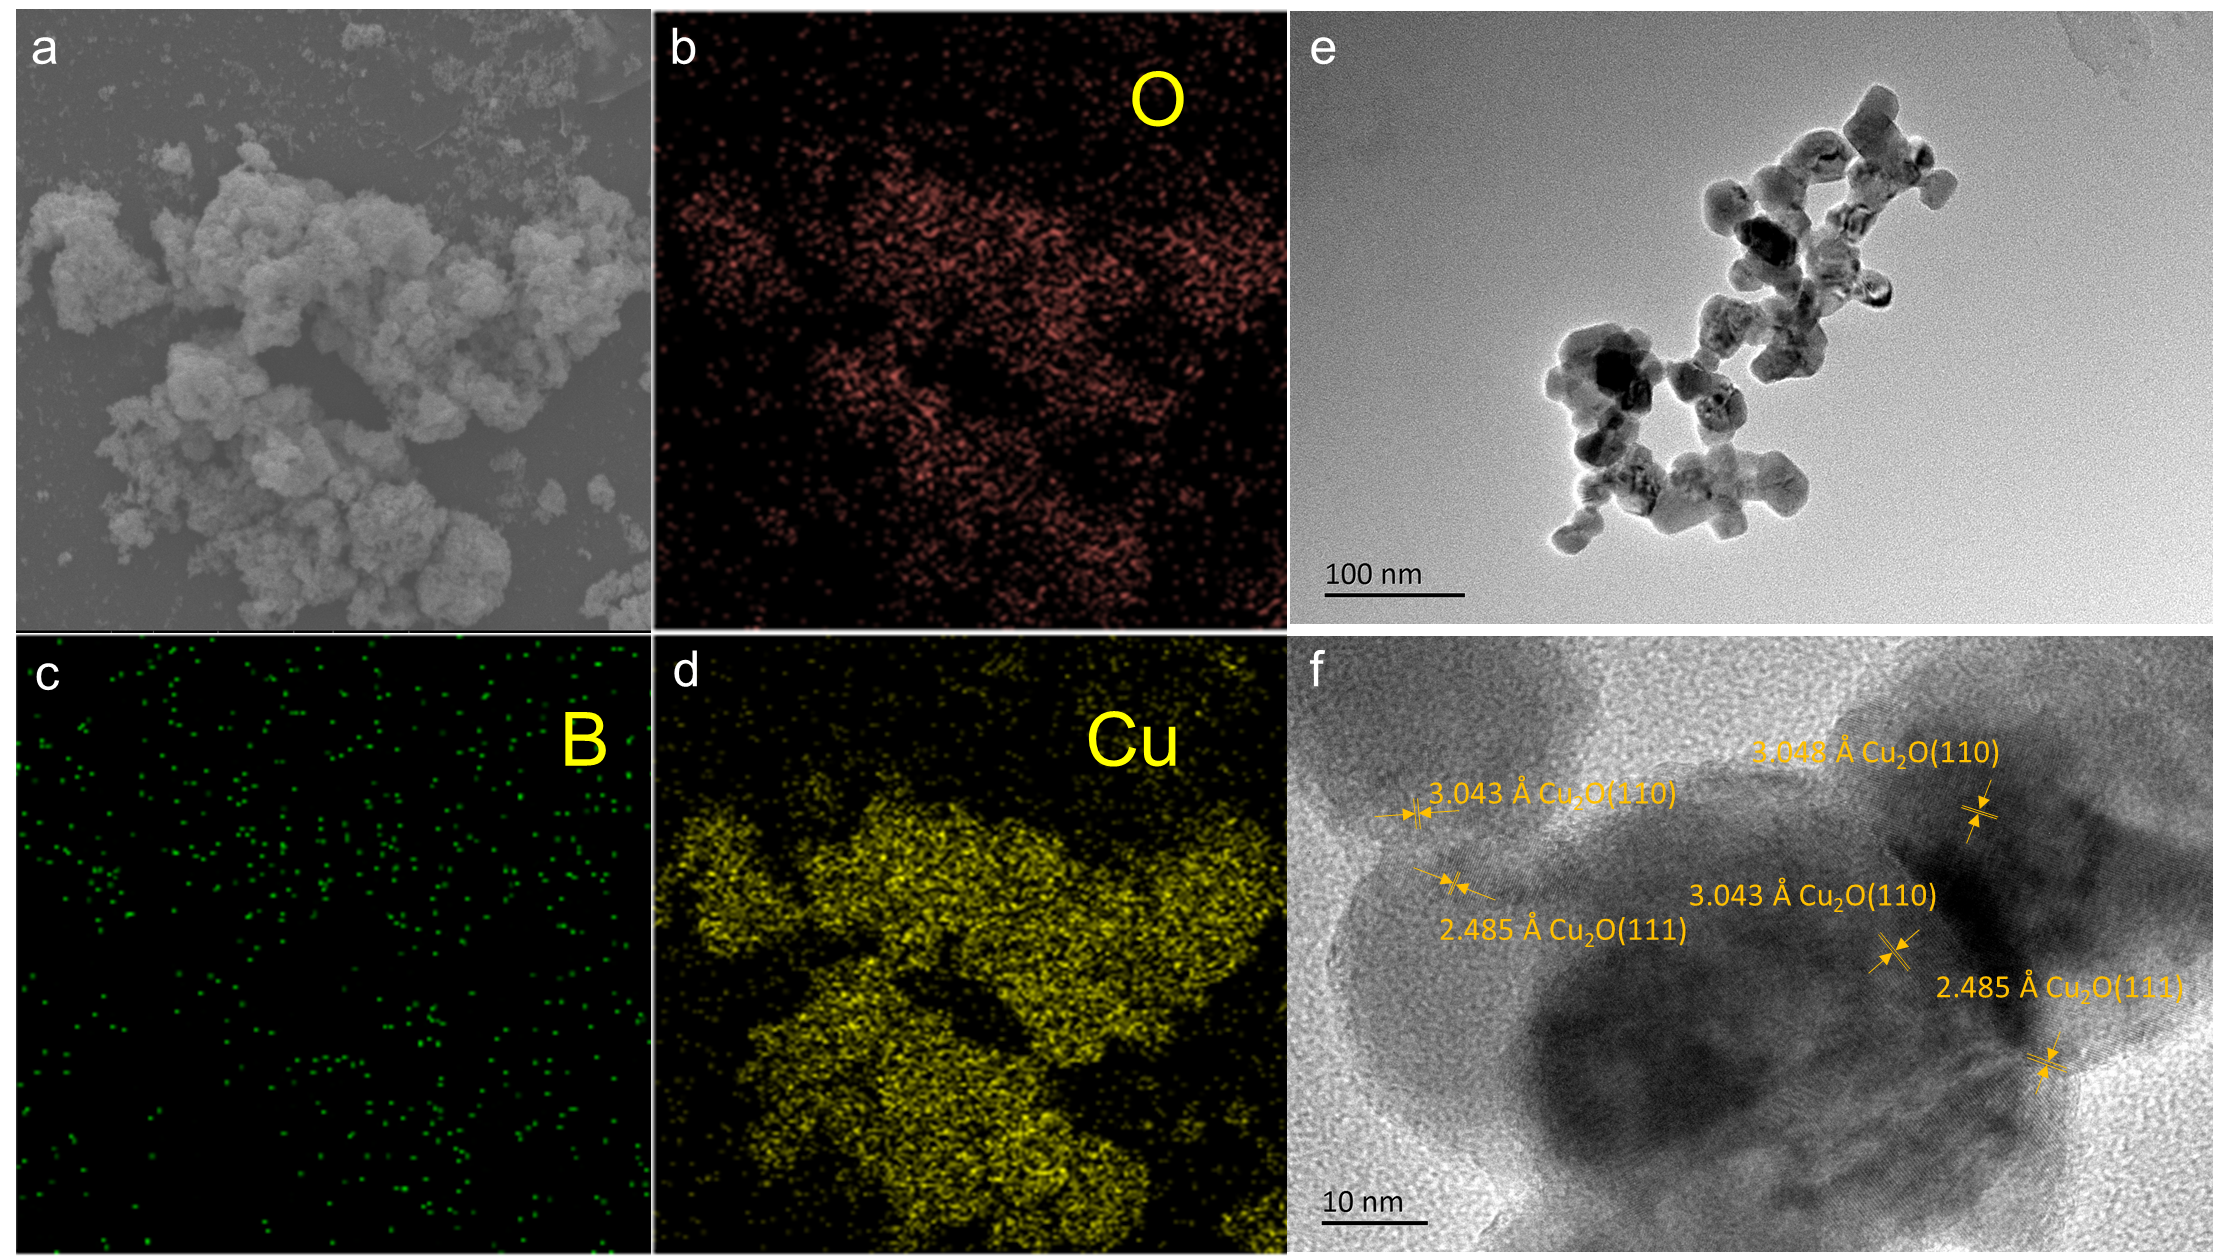


Figure S2 . a) SEM images and Mapping of b) O c) B d) Cu elemental surface distributionsof CuB2. e) TEM and HRTEM image of CuB2.


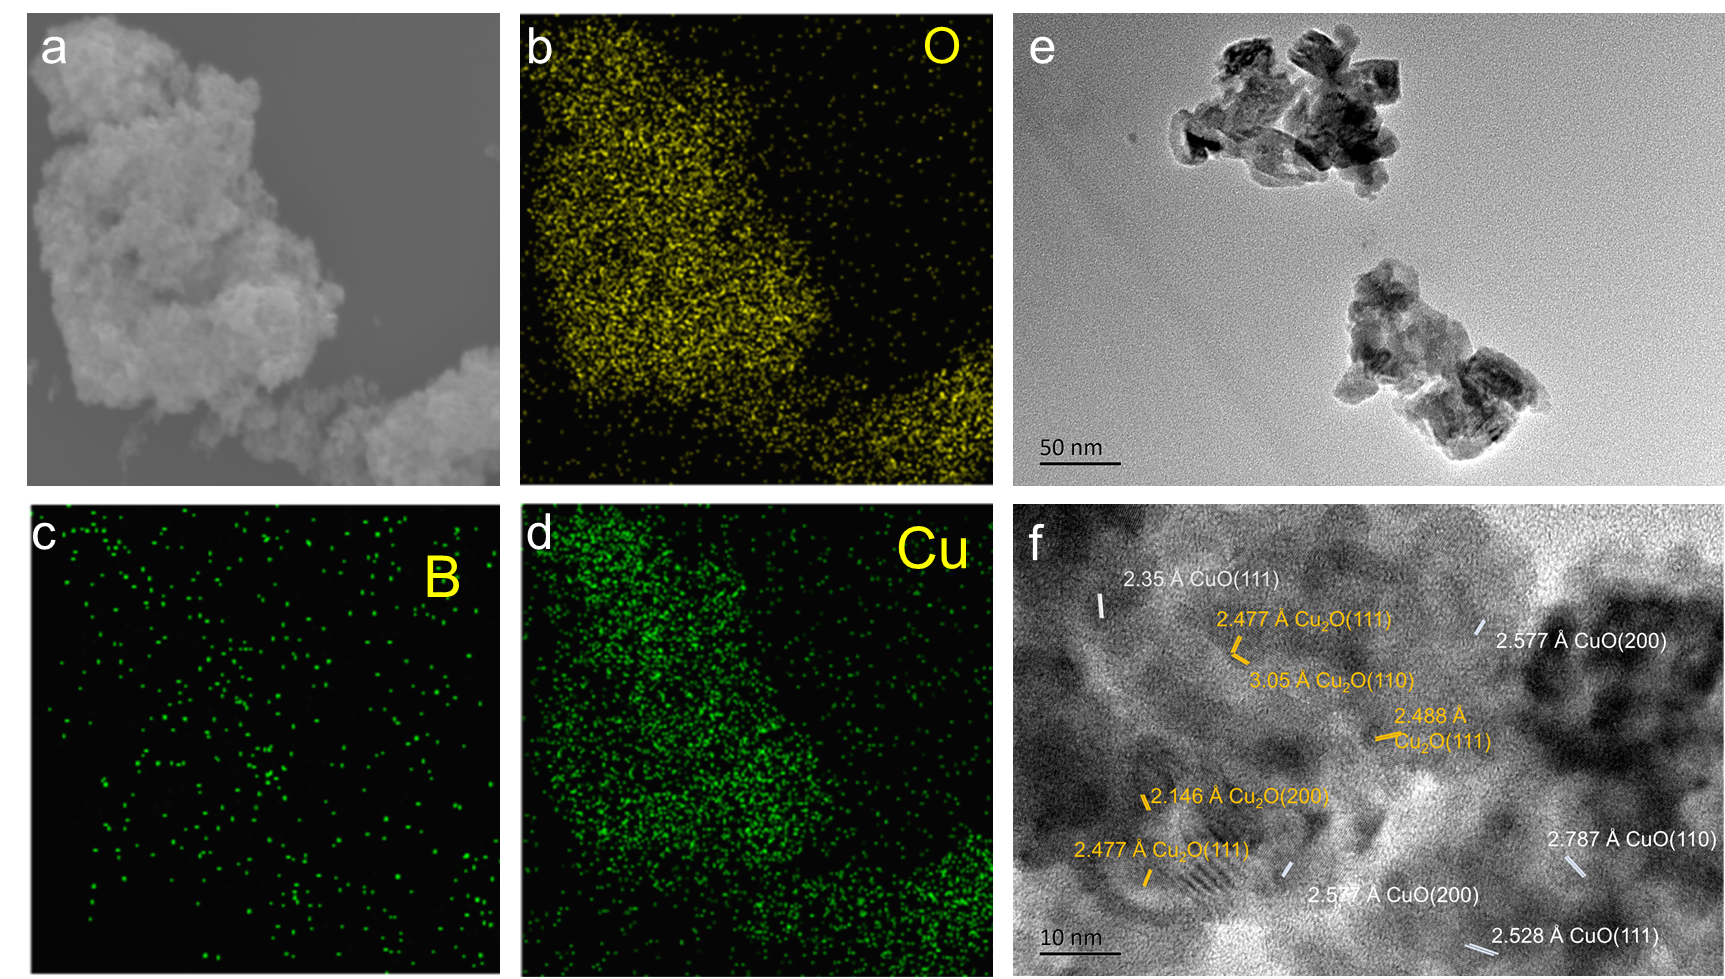


Figure S3 . a) SEM images and Mapping of b) O c) B d) Cu elemental surface distributionsof CuB5. e) TEM and HRTEM image of CuB5.


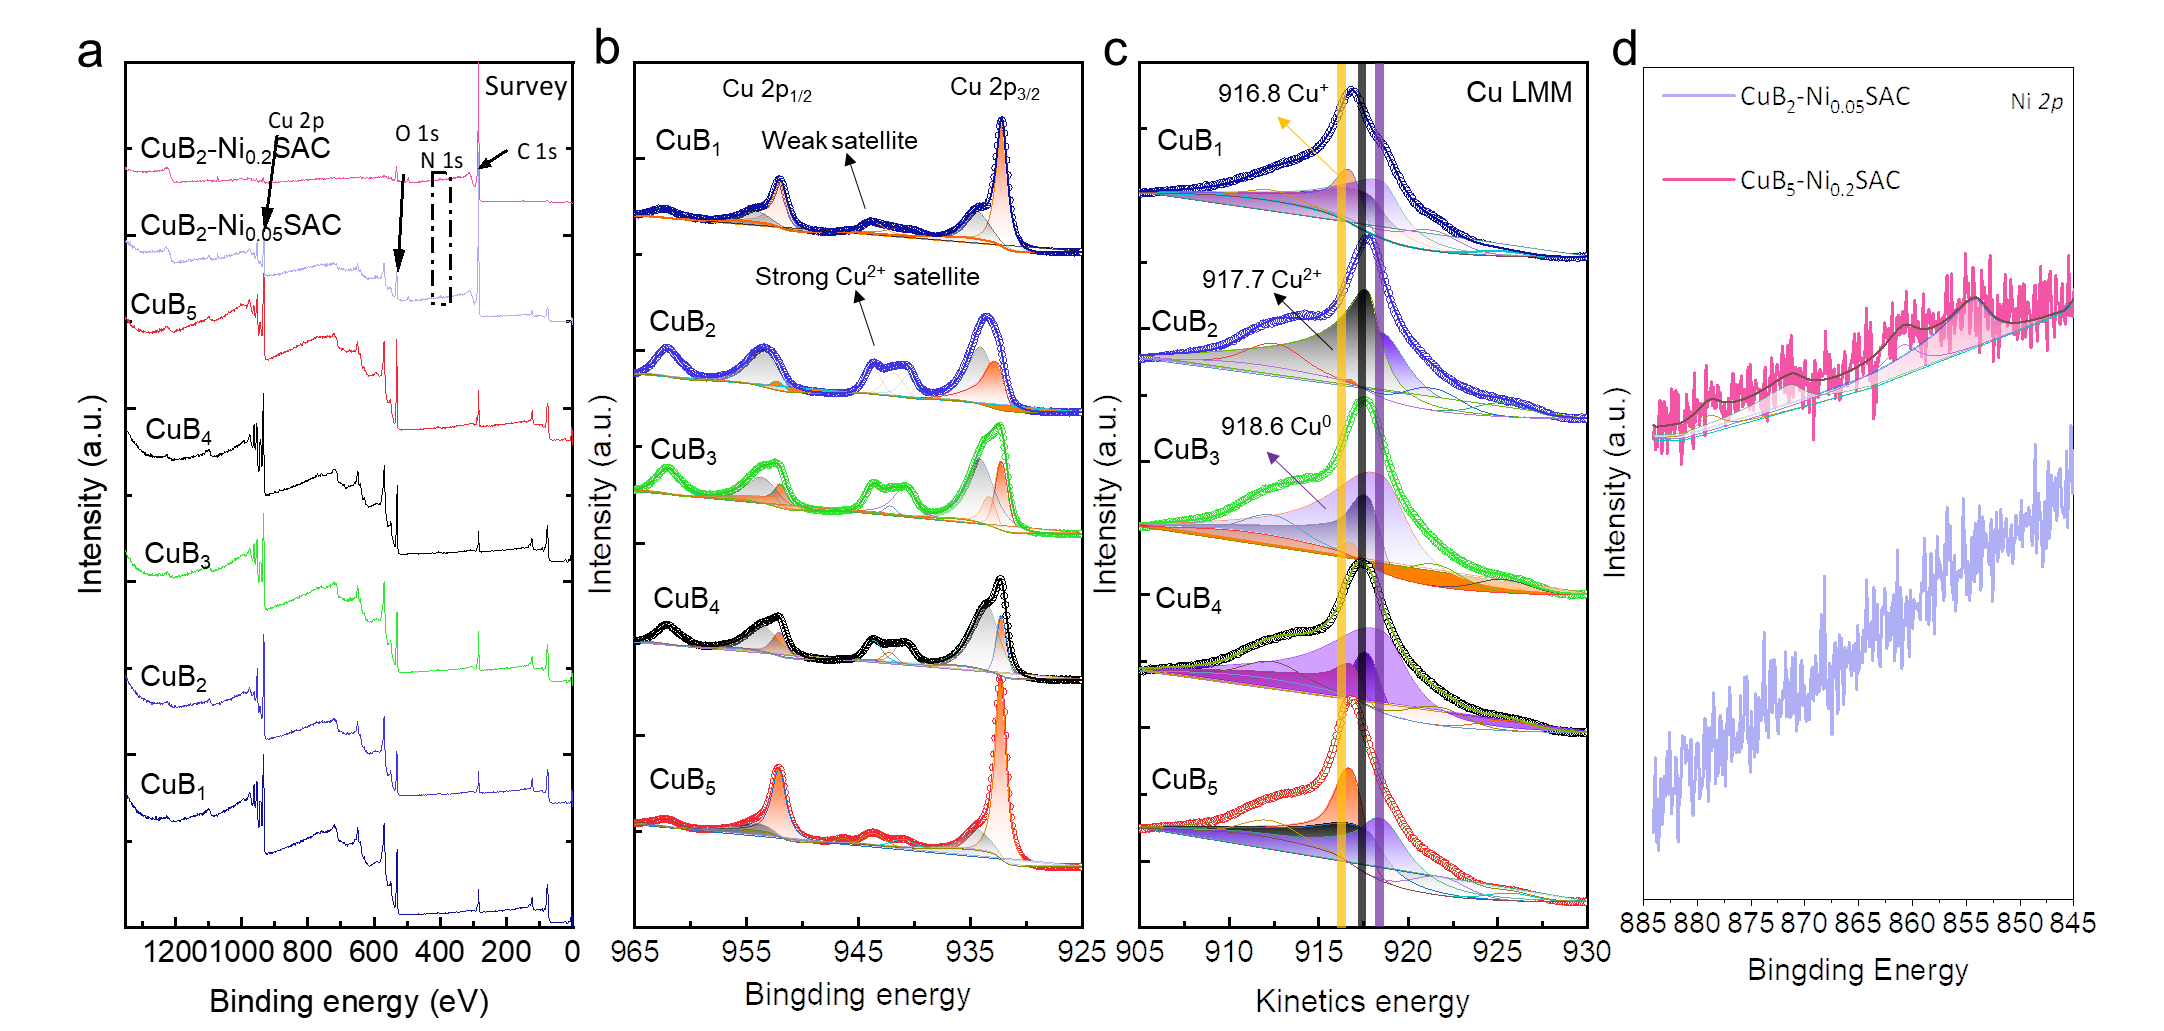


Figure S4 a) Survey , b) Cu 2p c) Cu LMM d) Ni 2p XPS spectra of the CuB*x*-Ni*y*SAC.


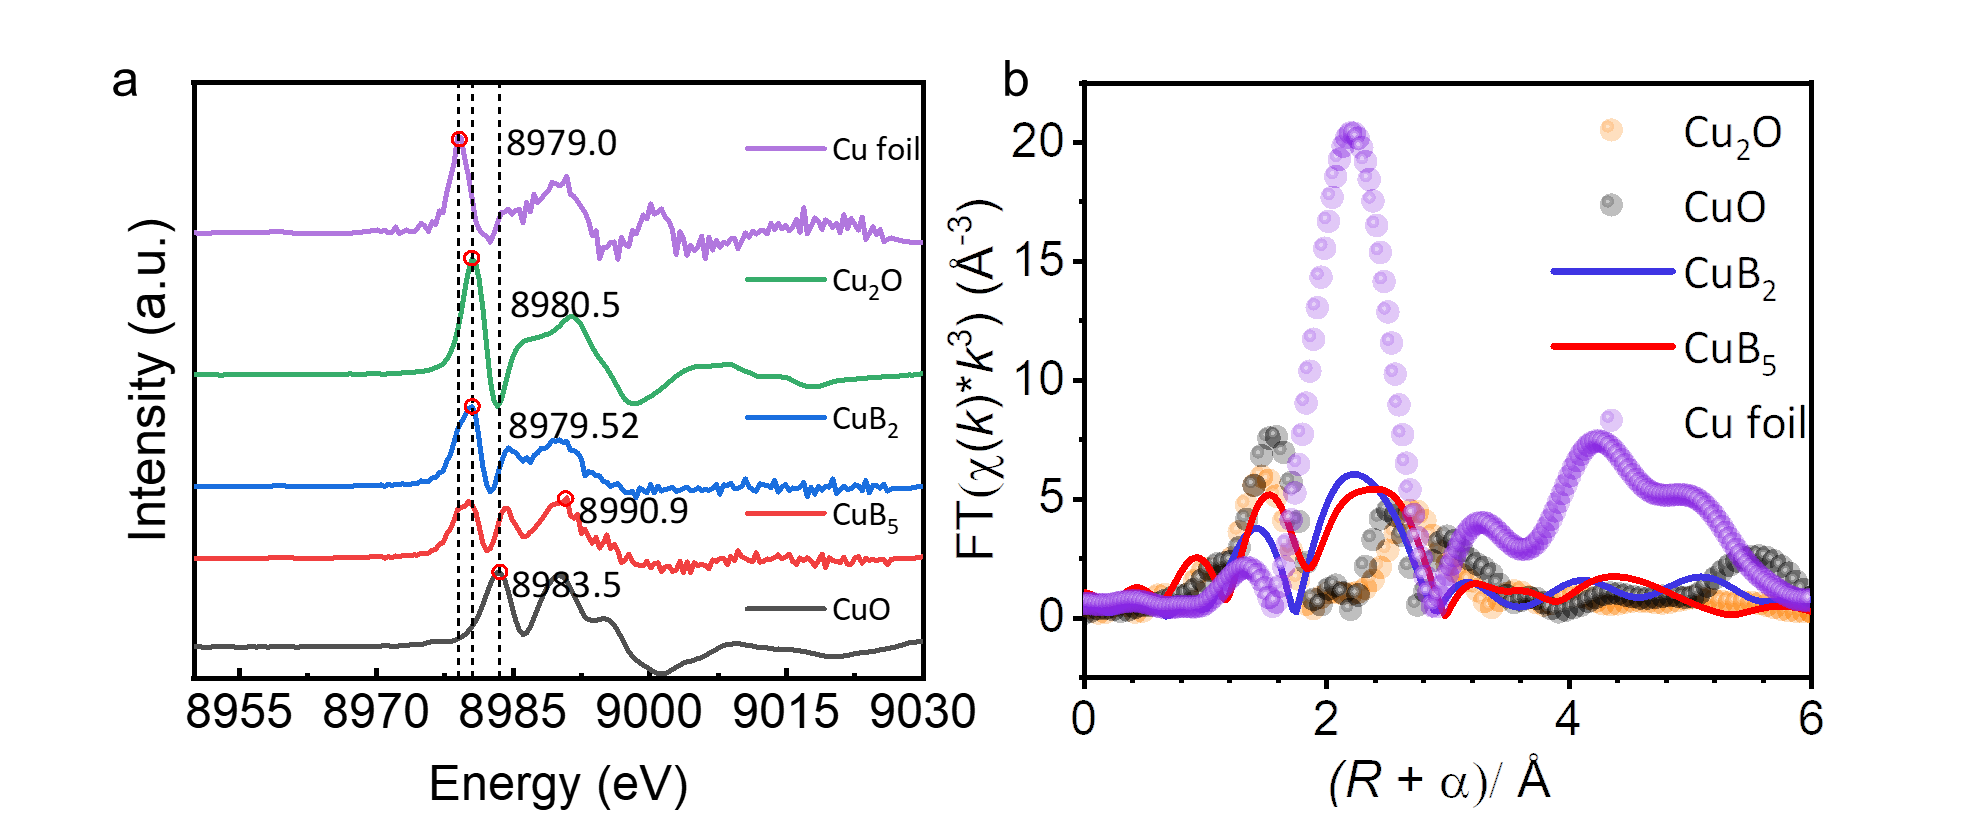


Figure S5 a) The near-edge first-order derivative diagram of Cu K-edge Survey of CuB*X*, b) Cu K-edge EXAFS curvefit for CuB2, CuB5 and standard sample shown in R-space The data are k3-weighted and not phase-corrected.


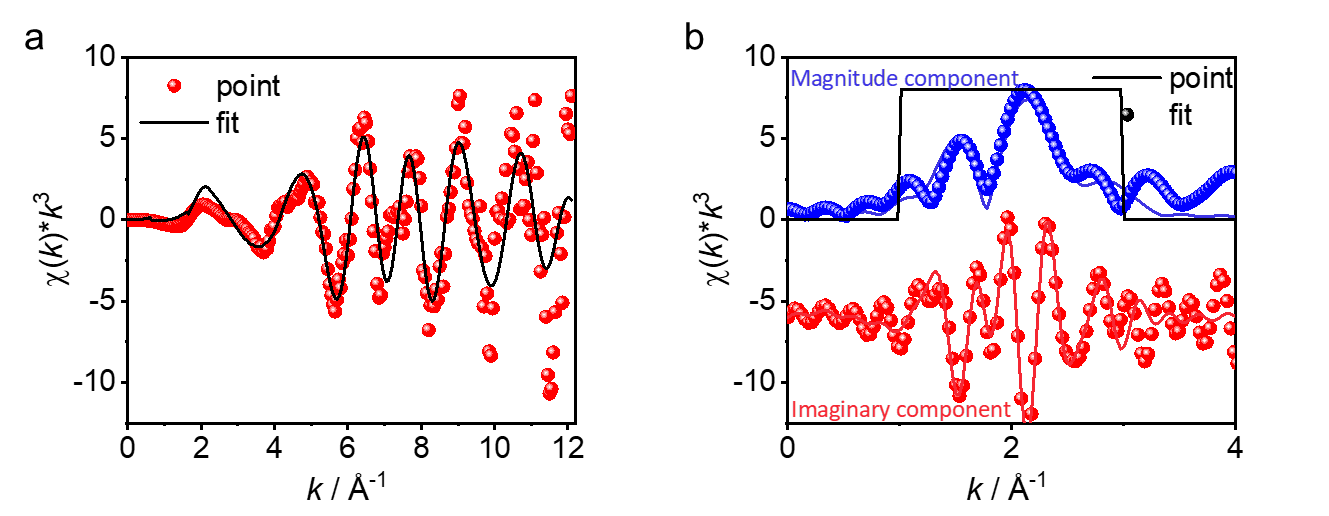


Figure S6. a) Cu K-edge EXAFS (points) and the curvefit (line) for CuB2 shown in k3weighted *k*-space. b) Cu K-edge EXAFS (points) and curvefit (line) for CuB2 shown in R-space (FT magnitude and imaginary component). The data are k3-weighted and not phase-corrected.


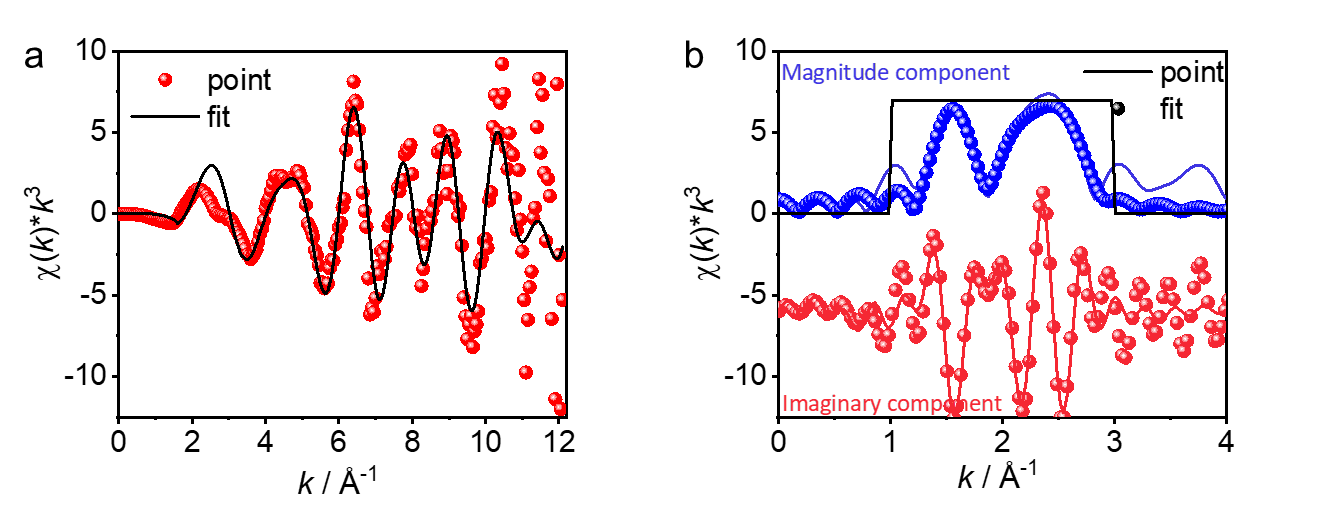


Figure S7. a) Cu K-edge EXAFS (points) and the curvefit (line) for CuB5 shown in k3weighted *k*-space. b) Cu K-edge EXAFS (points) and curvefit (line) for CuB5 shown in R-space (FT magnitude and imaginary component). The data are k3-weighted and not phase-corrected.


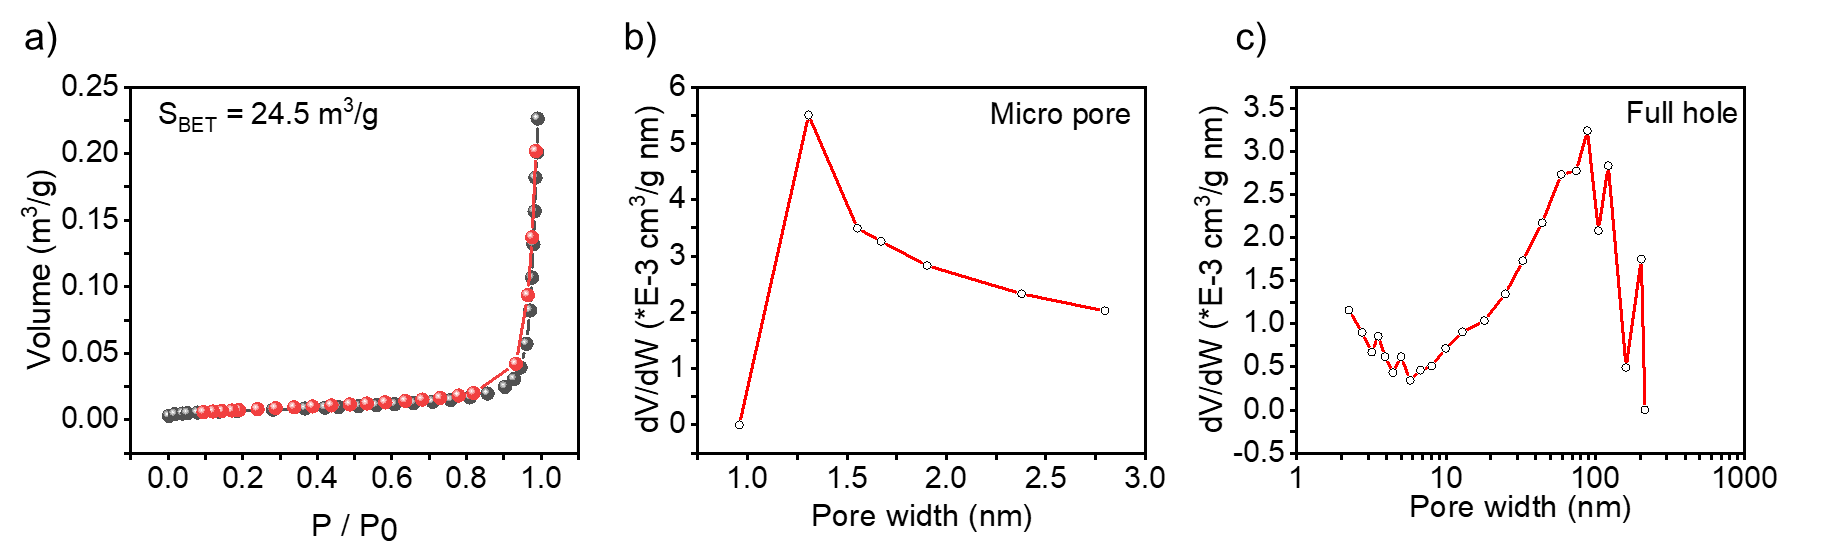


Figure S8. a) Adsorption and desorption isotherm and specific surface area measurements of CuB2 sample. b,c ) Pore size distribution of CuB2 micropores and whole pores, respectively.


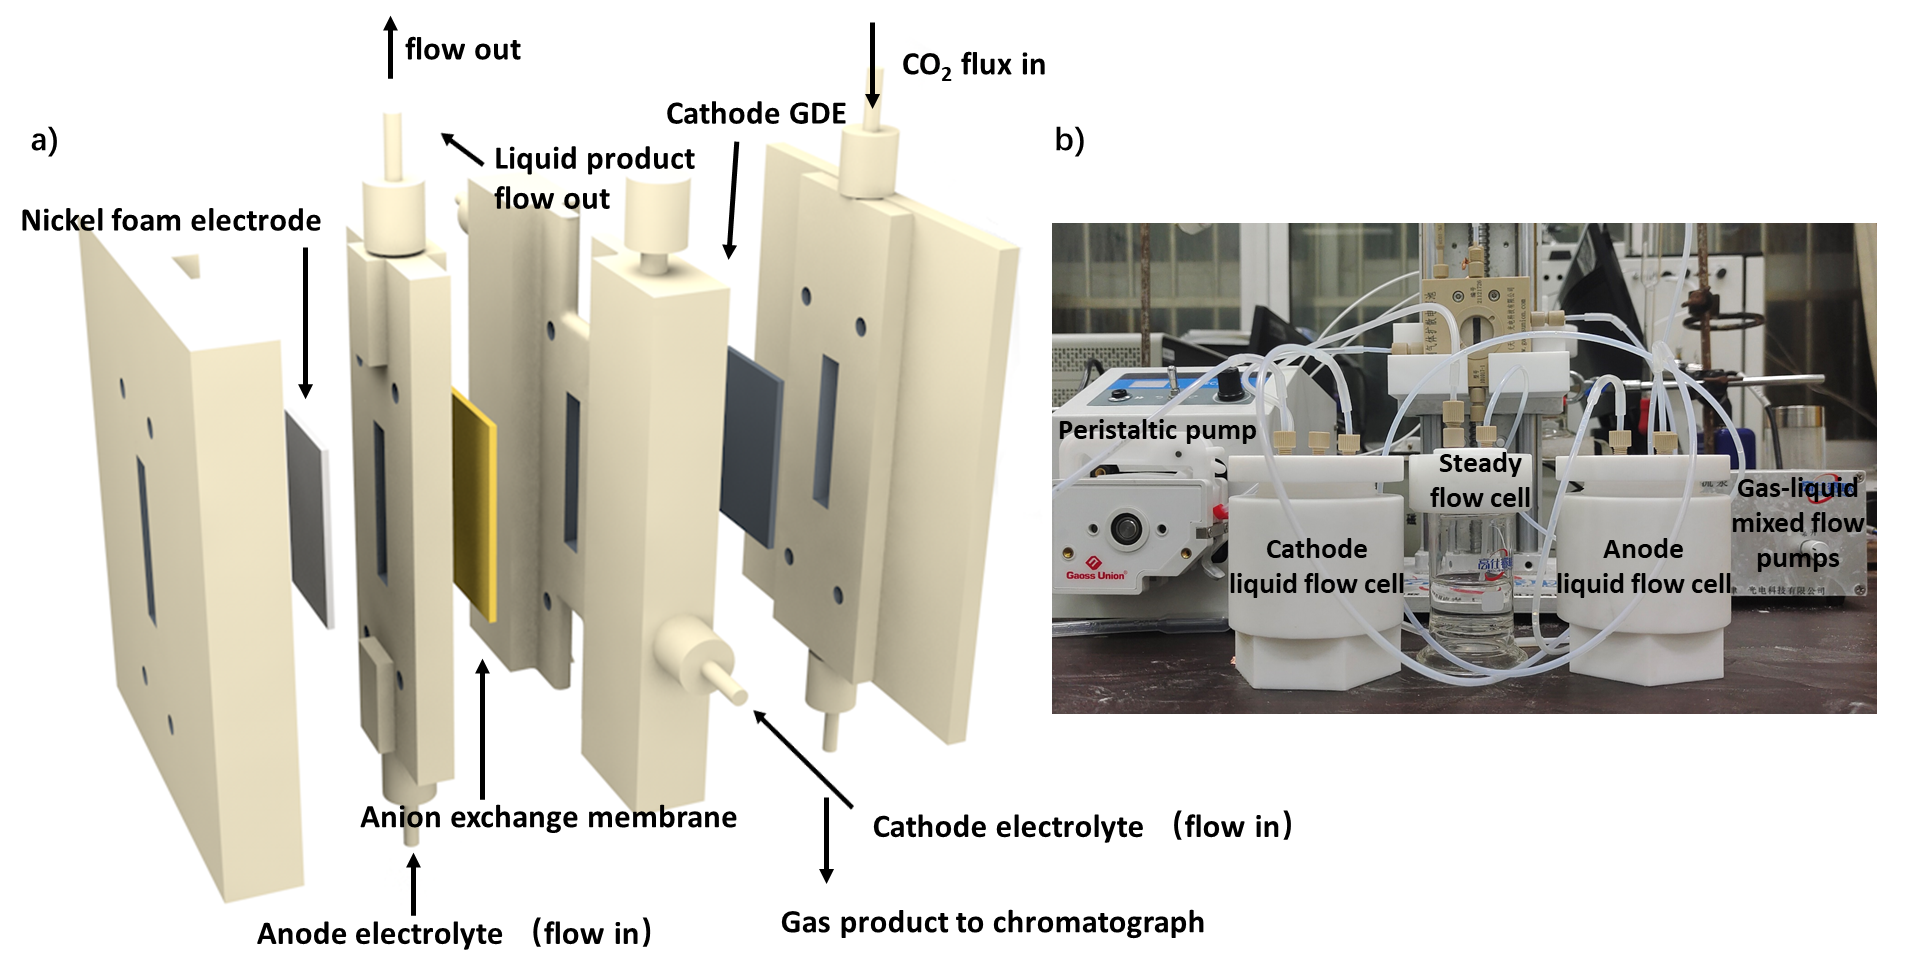


Figure S9. Diagram of the control experimental group with a photograph of the catalyst ink and the corresponding catalyst spray.

Figure S10. CO2RR performance of Ni-SAC in a flow cell with 0.5 M KHCO3 electrolyte.


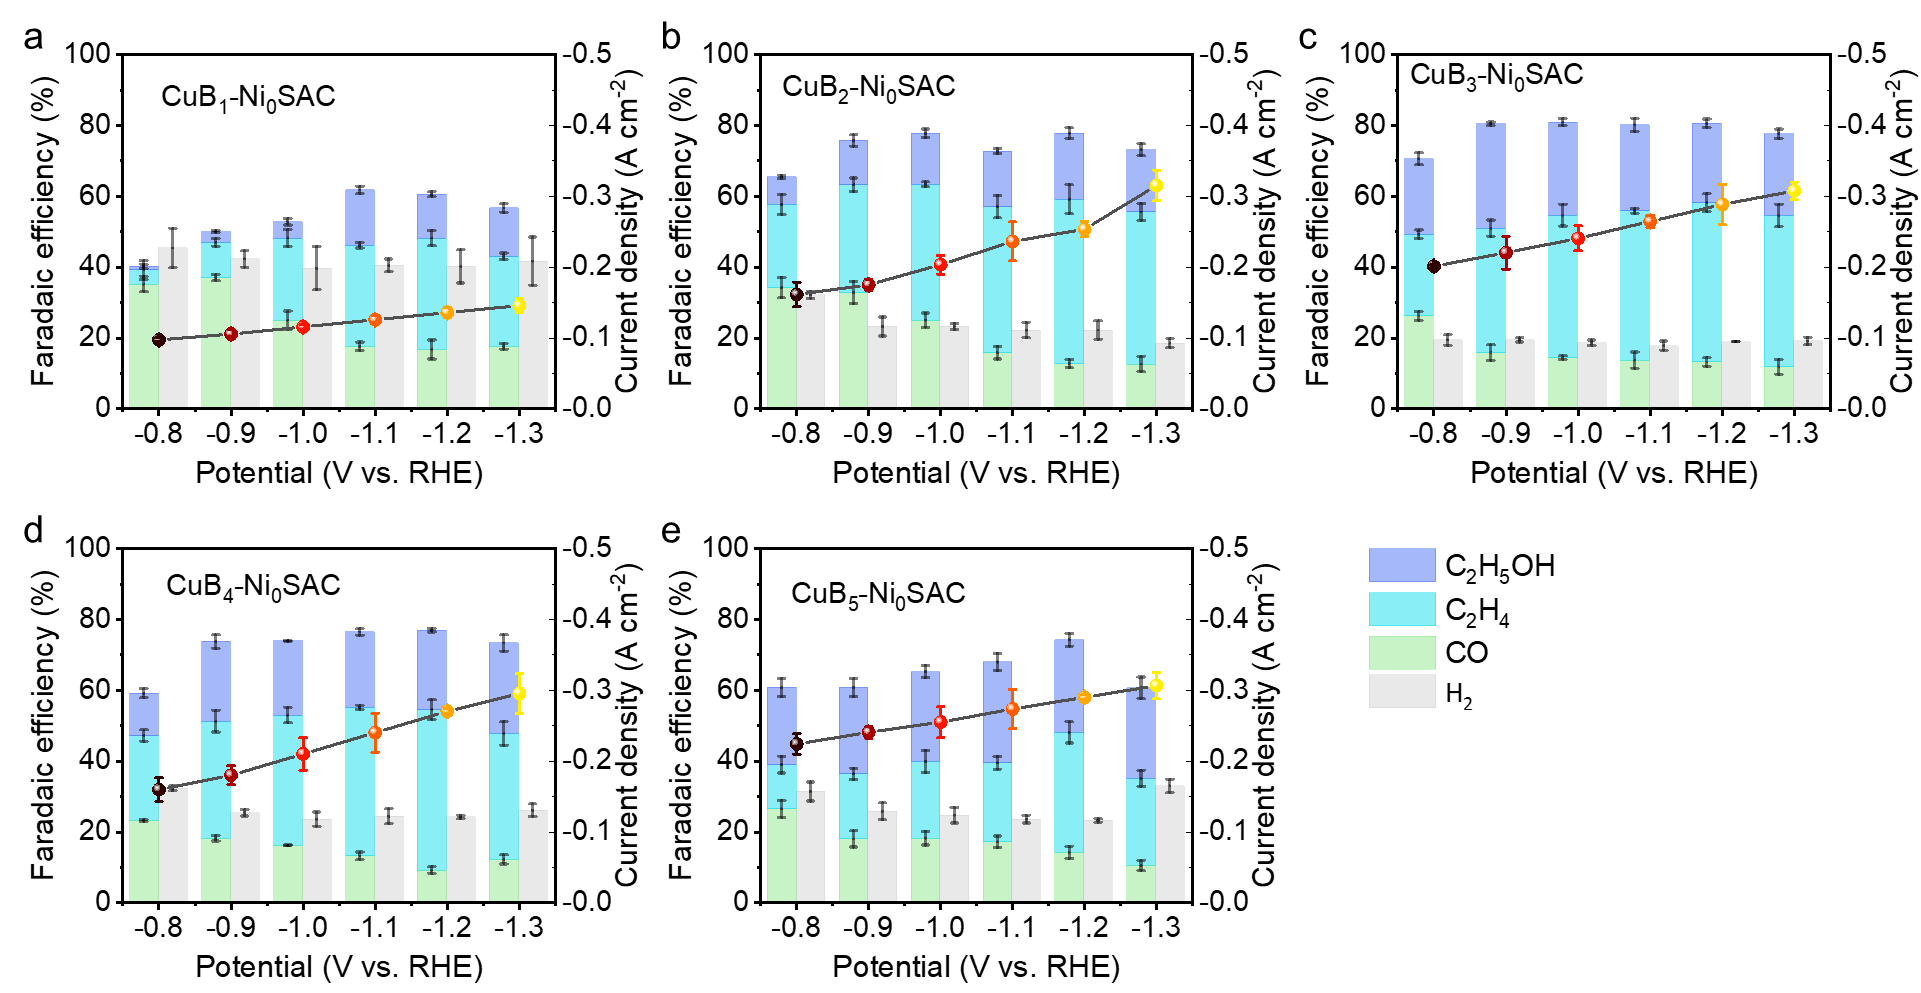


Figure S11. The CO2RR performance of unhybridized Ni-SAC with different contents of CuB*x* at -0.8 to -1.3 V vs. RHE.


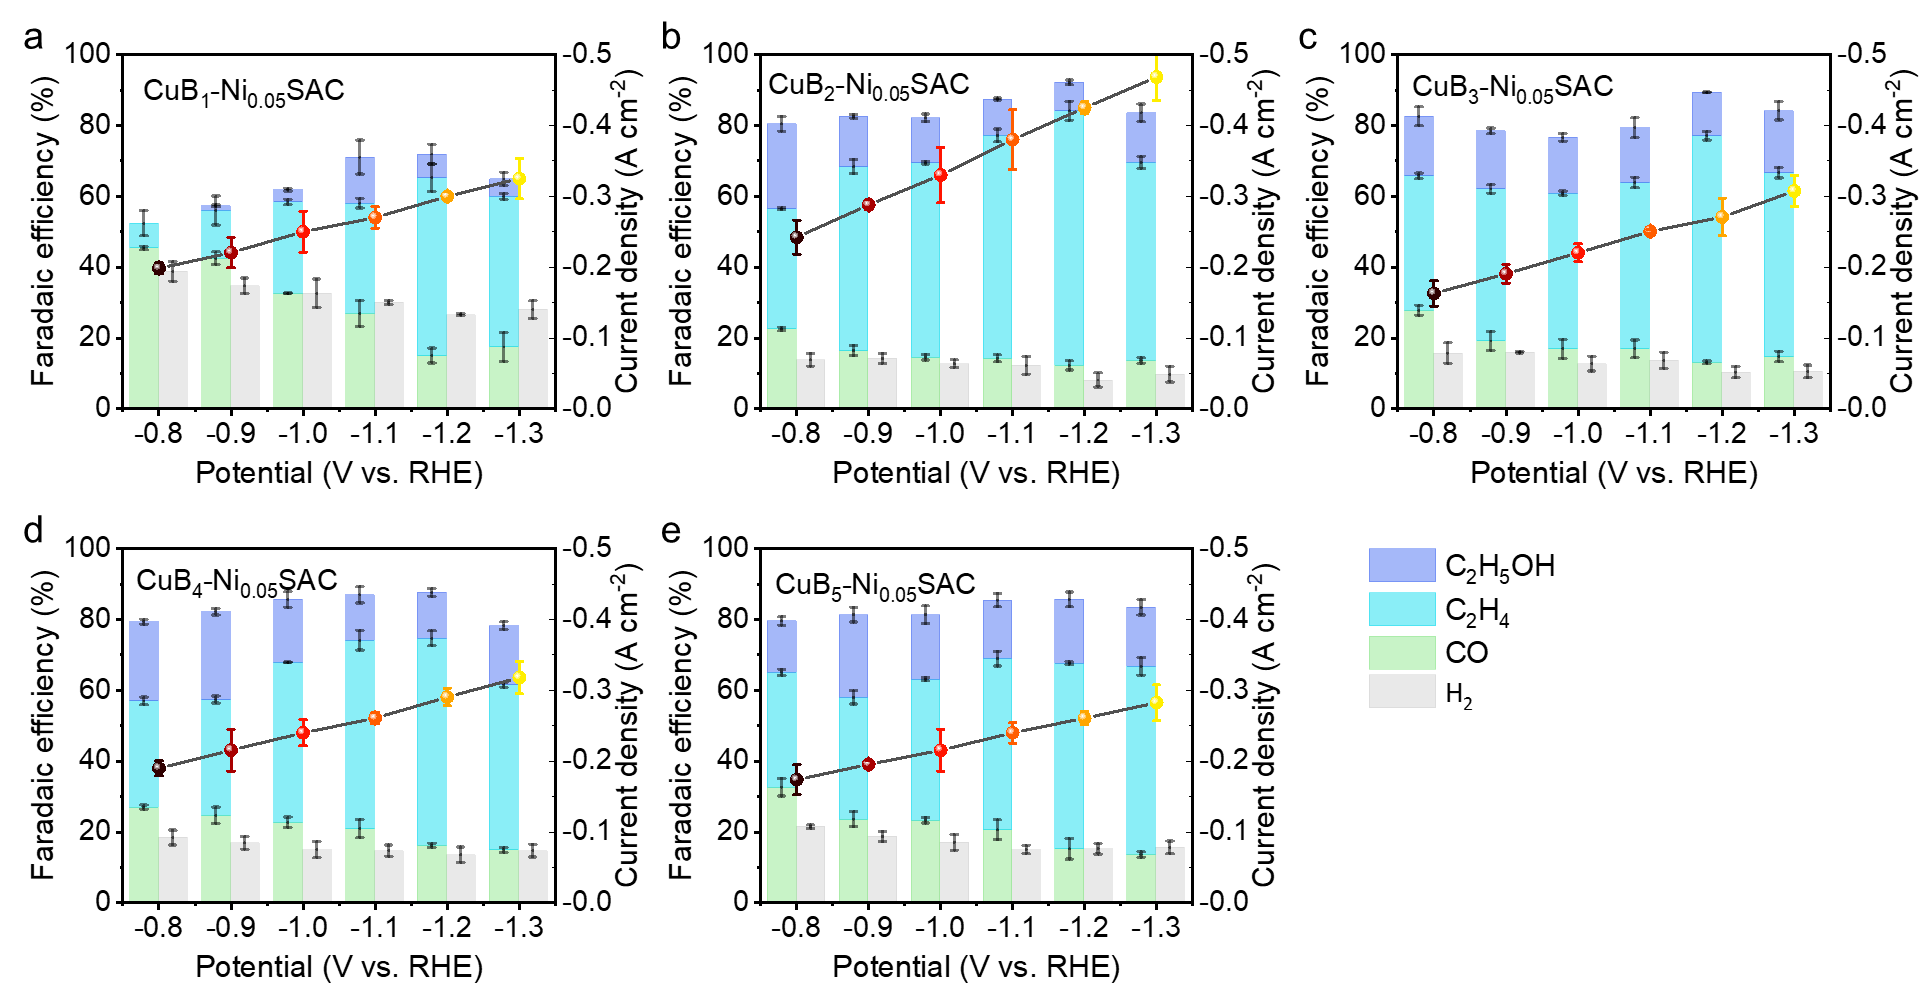


Figure S12.The mass ratio of Ni-SAC hybridized with different contents of CuB*x* is 0.05, which corresponds to the CO2RR performance at -0.8 to -1.3 V vs. RHE.


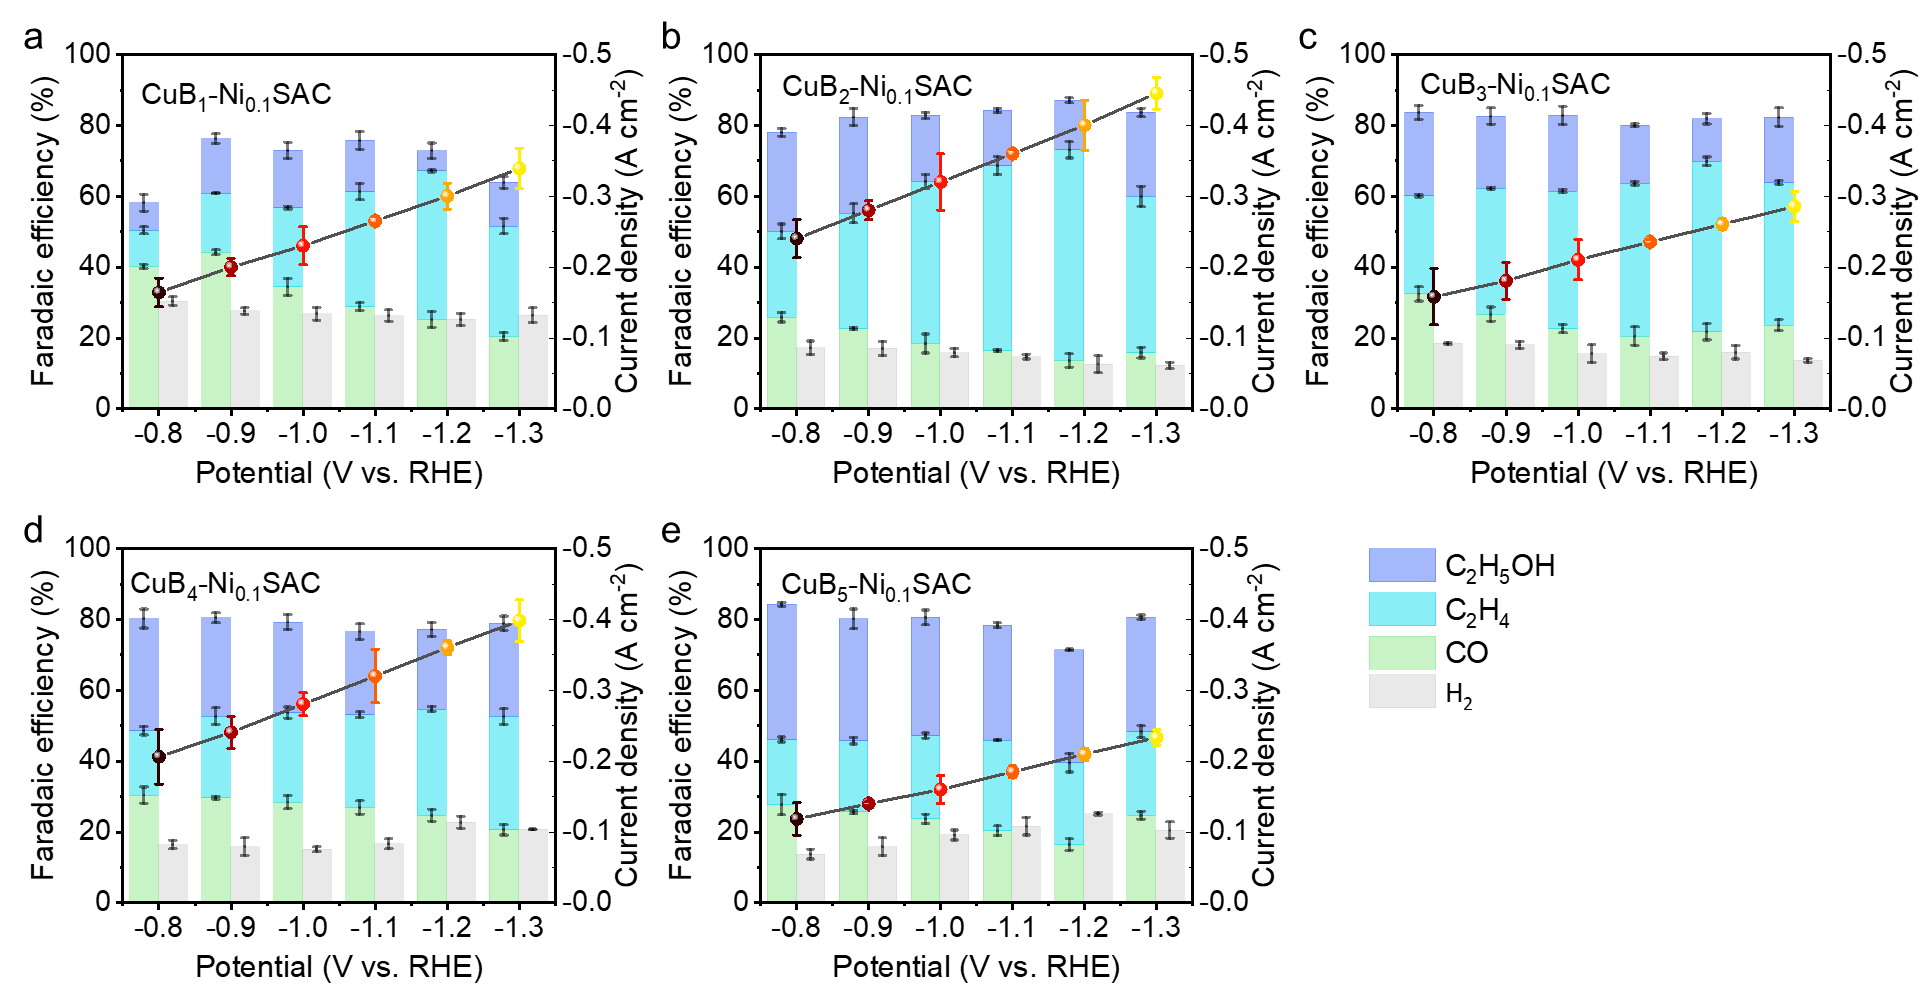


Figure S13.The mass ratio of Ni-SAC hybridized with different contents of CuB*x* is 0.1, which corresponds to the CO2RR performance at -0.8 to -1.3 V vs. RHE.


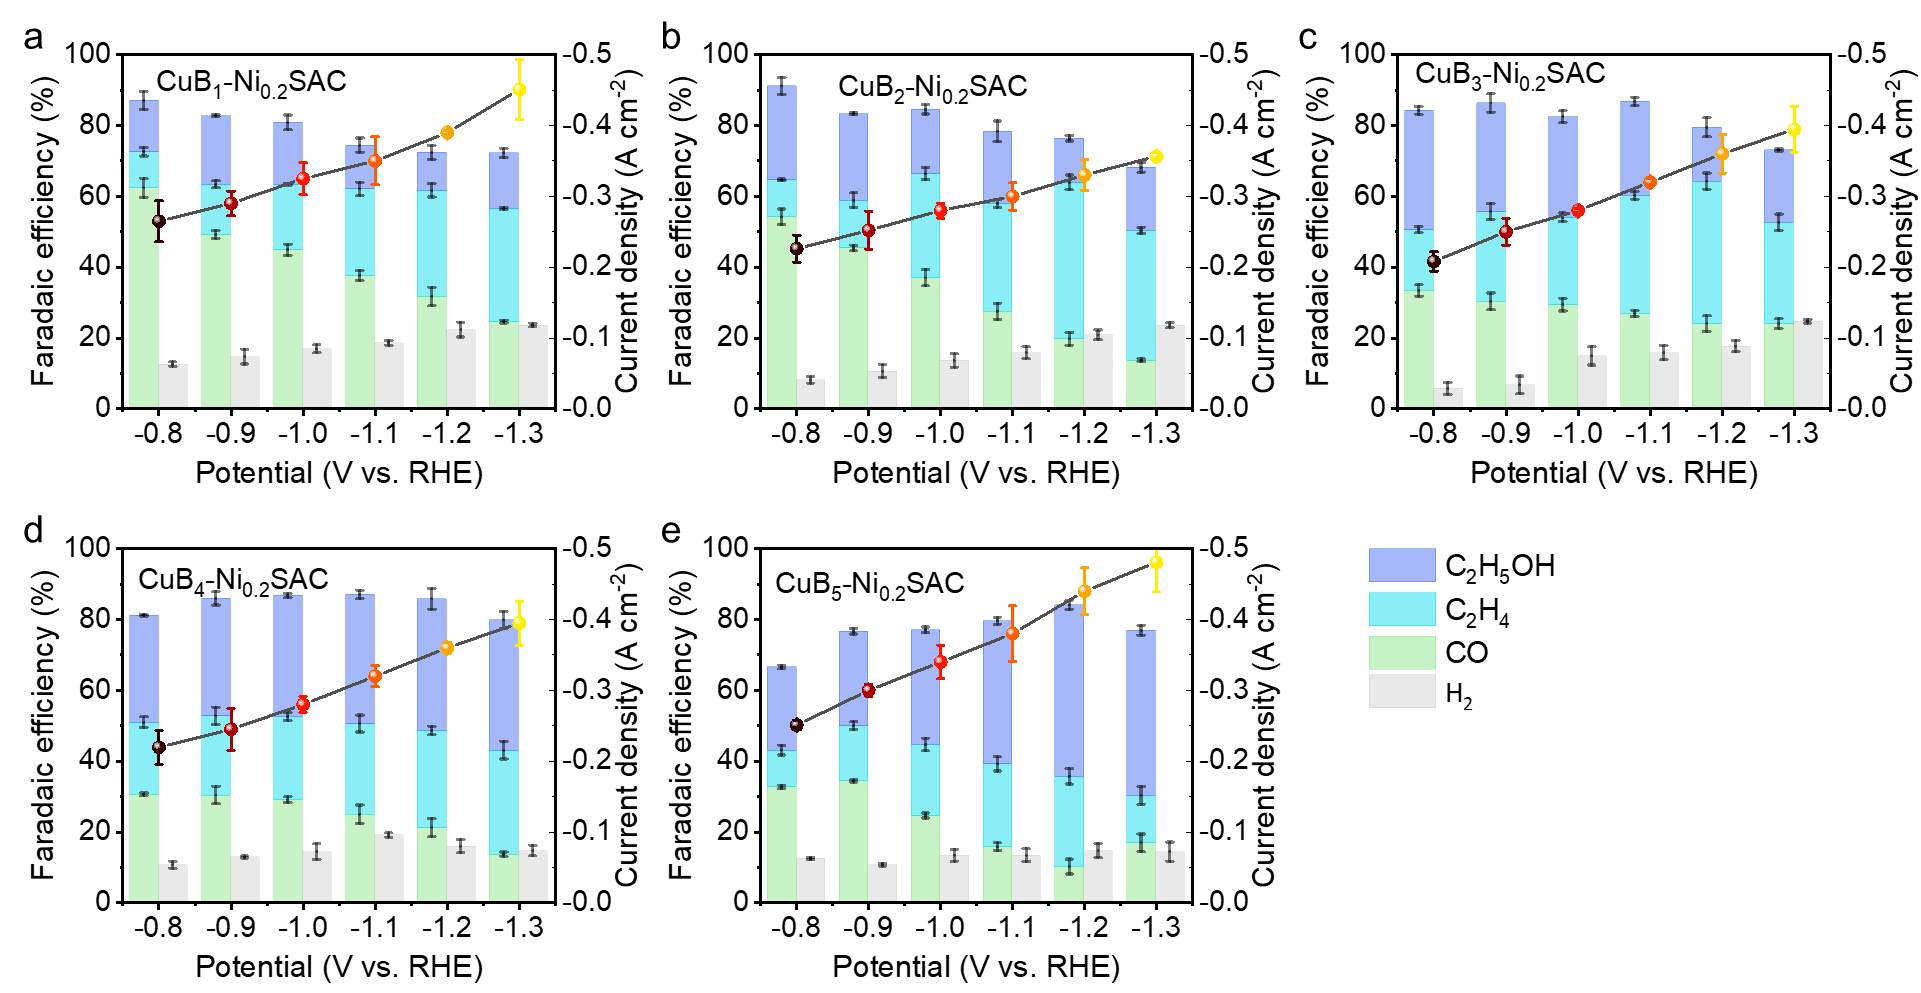


Figure S14.The mass ratio of Ni-SAC hybridized with different contents of CuB*x* is 0.2, which corresponds to the CO2RR performance at -0.8 to -1.3 V vs. RHE.


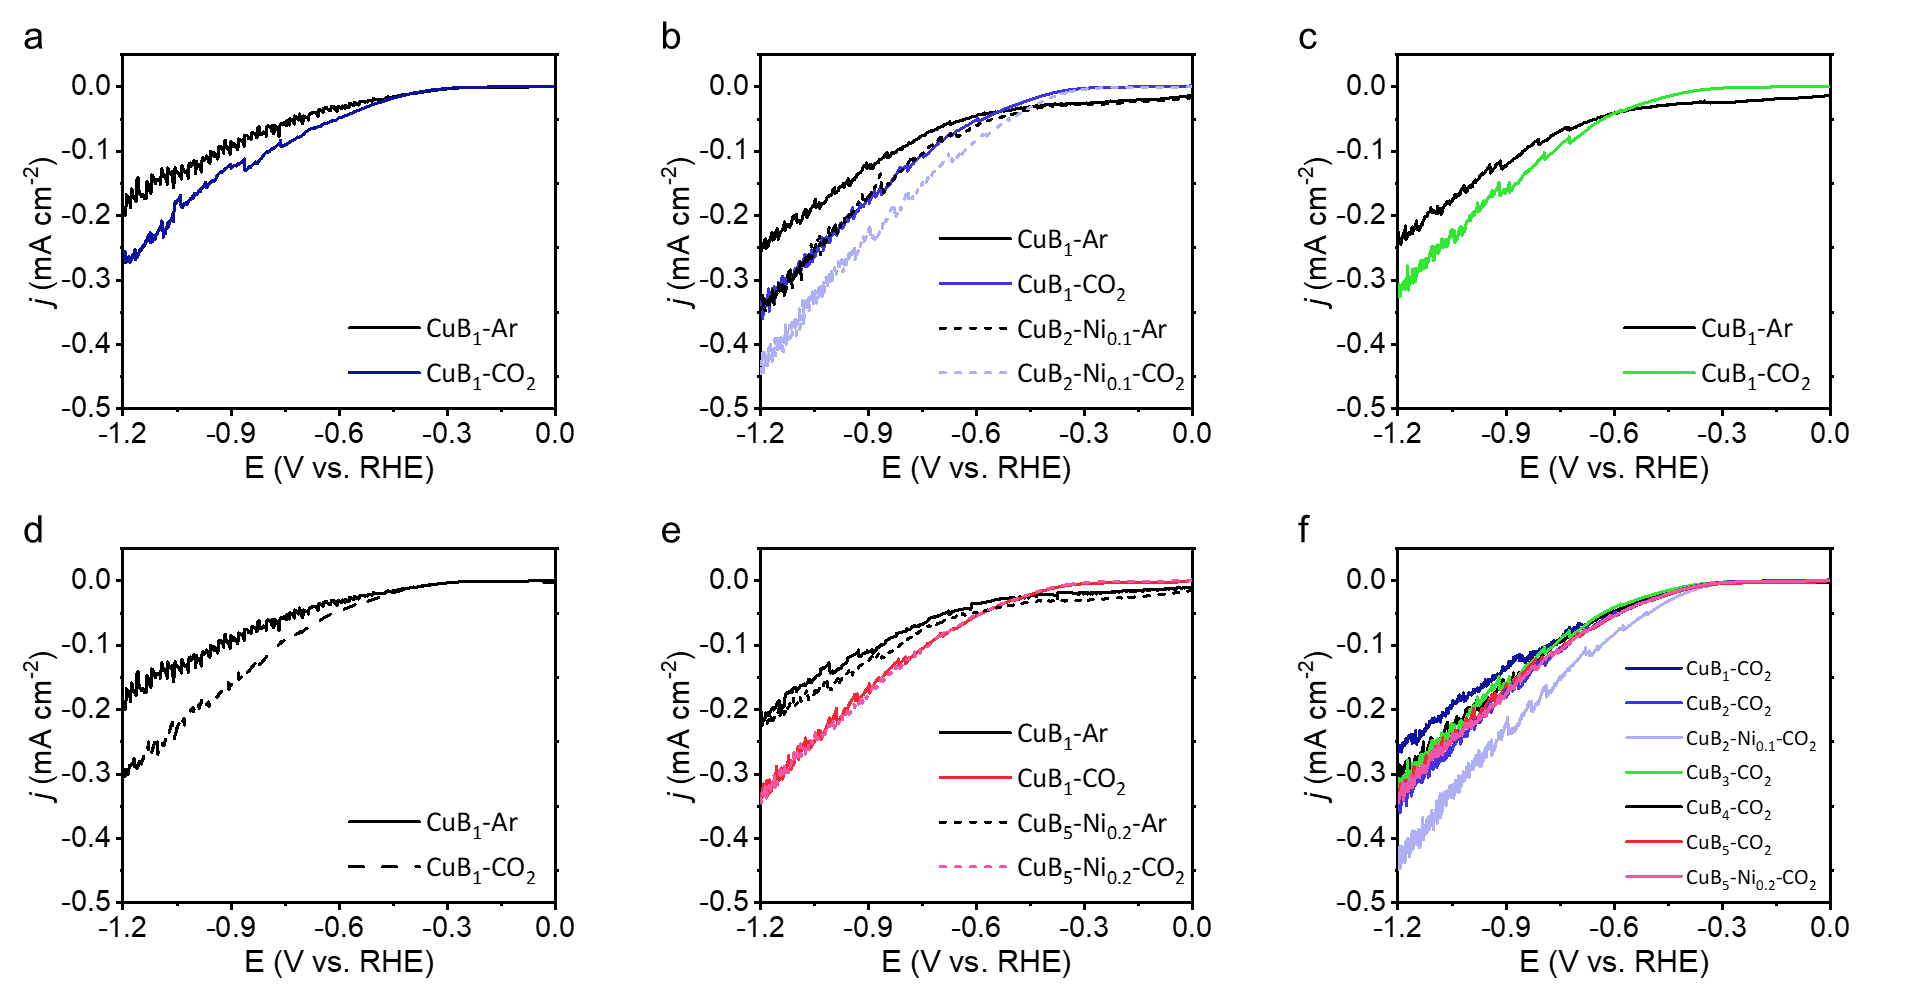


Figure S15. Linear voltammetric curves of hybrid catalysts with different B contents of CuB*x* as well as partially doped Ni-SAC under different atmospheres. The CO2RR performance of the synthesized catalysts was tested in a flow cell in 0.5 M KHCO3 electrolyte.


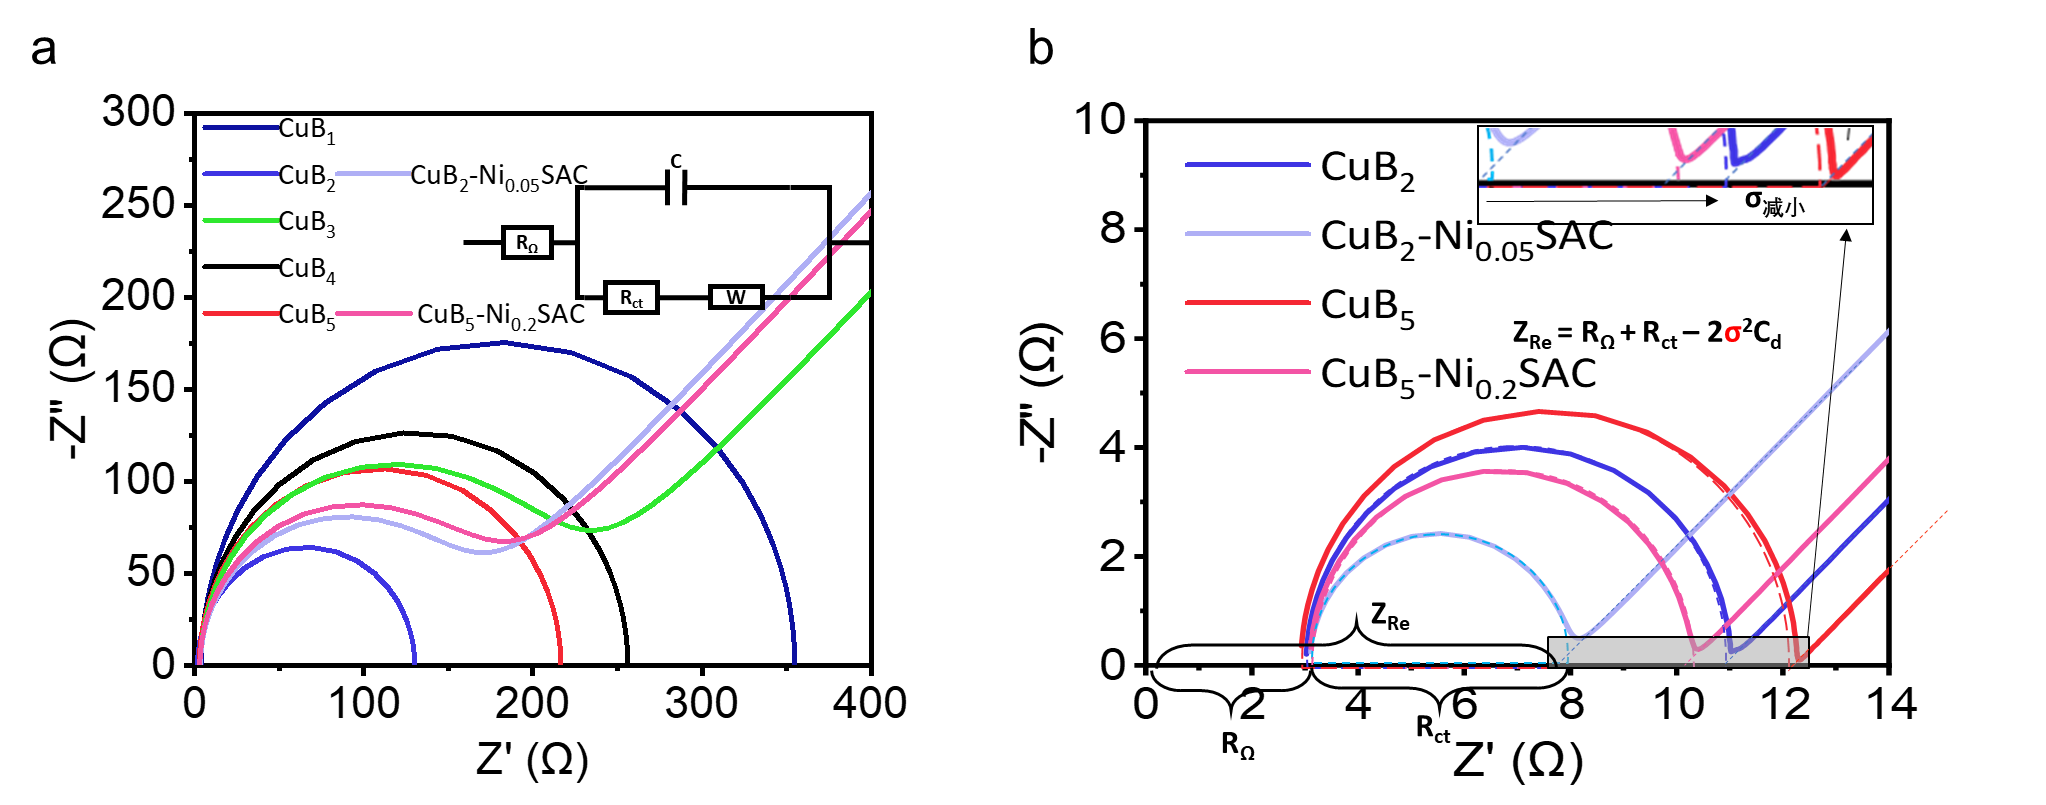


Figure S16. Electrochemical AC impedance Nyquist curves of hybrid catalysts with different B contents of CuB*x* as well as partially doped Ni-SAC. Additionally, the EIS experiments for CO2RR were conducted at the open voltage and an amplitude of the sinusoidal voltage of 5 mV (in a frequency range of 1-106 Hz)


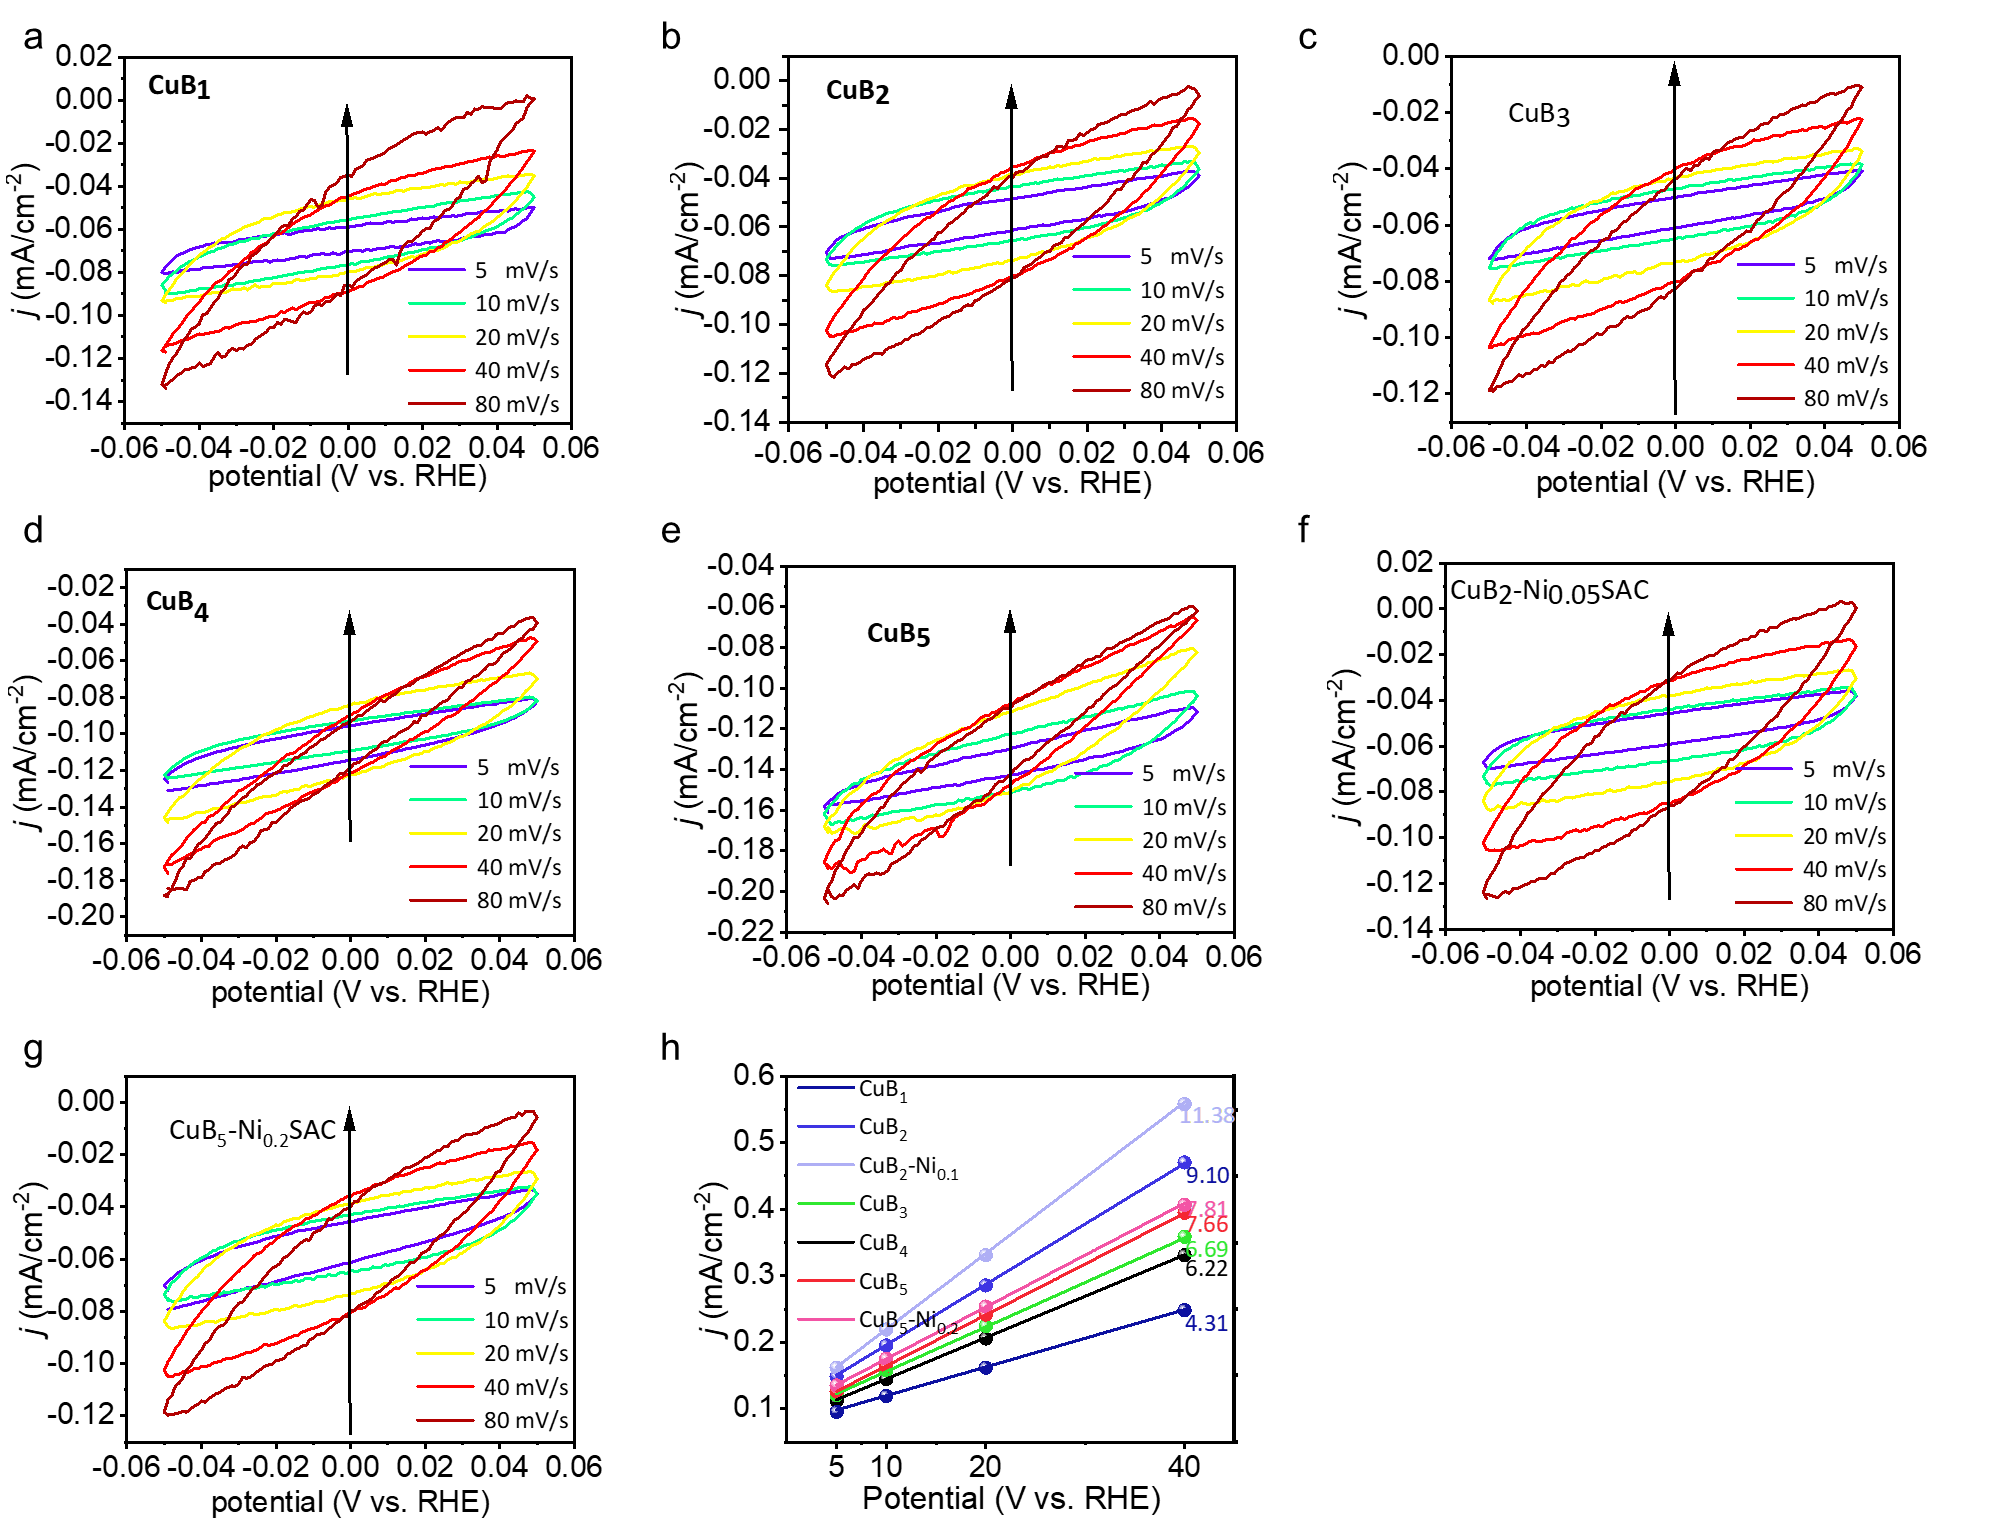


Figure S17. Electrochemically active surface area curves of hybrid catalysts with different B contents of CuB*x* as well as partially doped Ni-SAC by cyclic voltammetry.


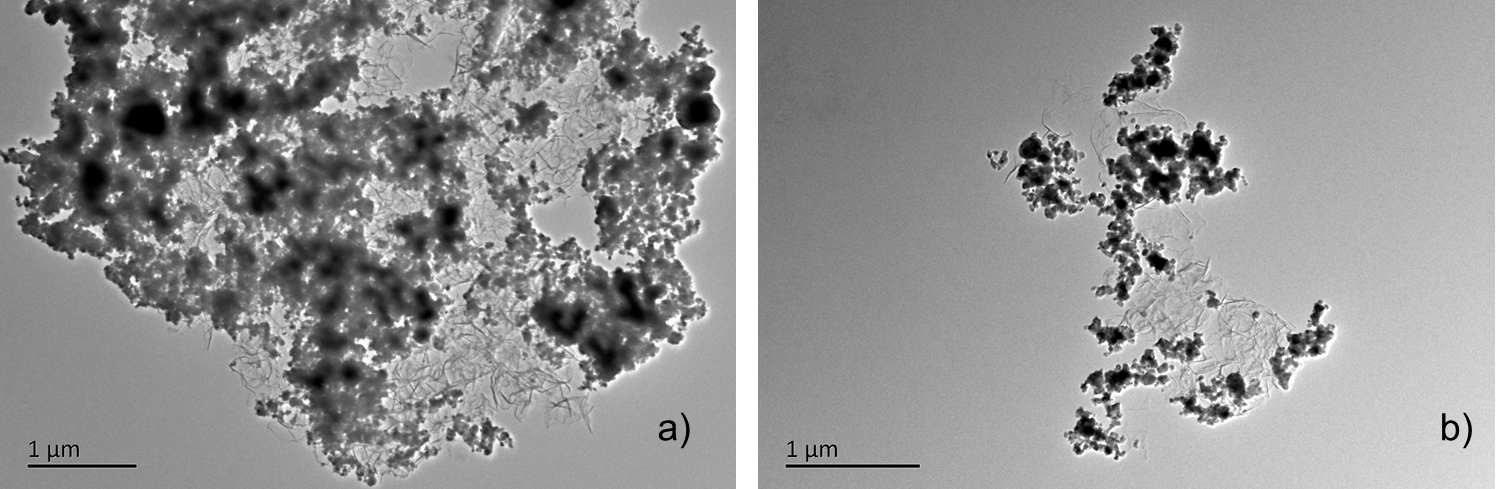
Figure S18. TEM images of CuB2-Ni0.05SAC (a) and CuB5-Ni0.2SAC (b) after electrolysis.

Figure S19. Solid-state Raman spectra of the Cu and CuB2.


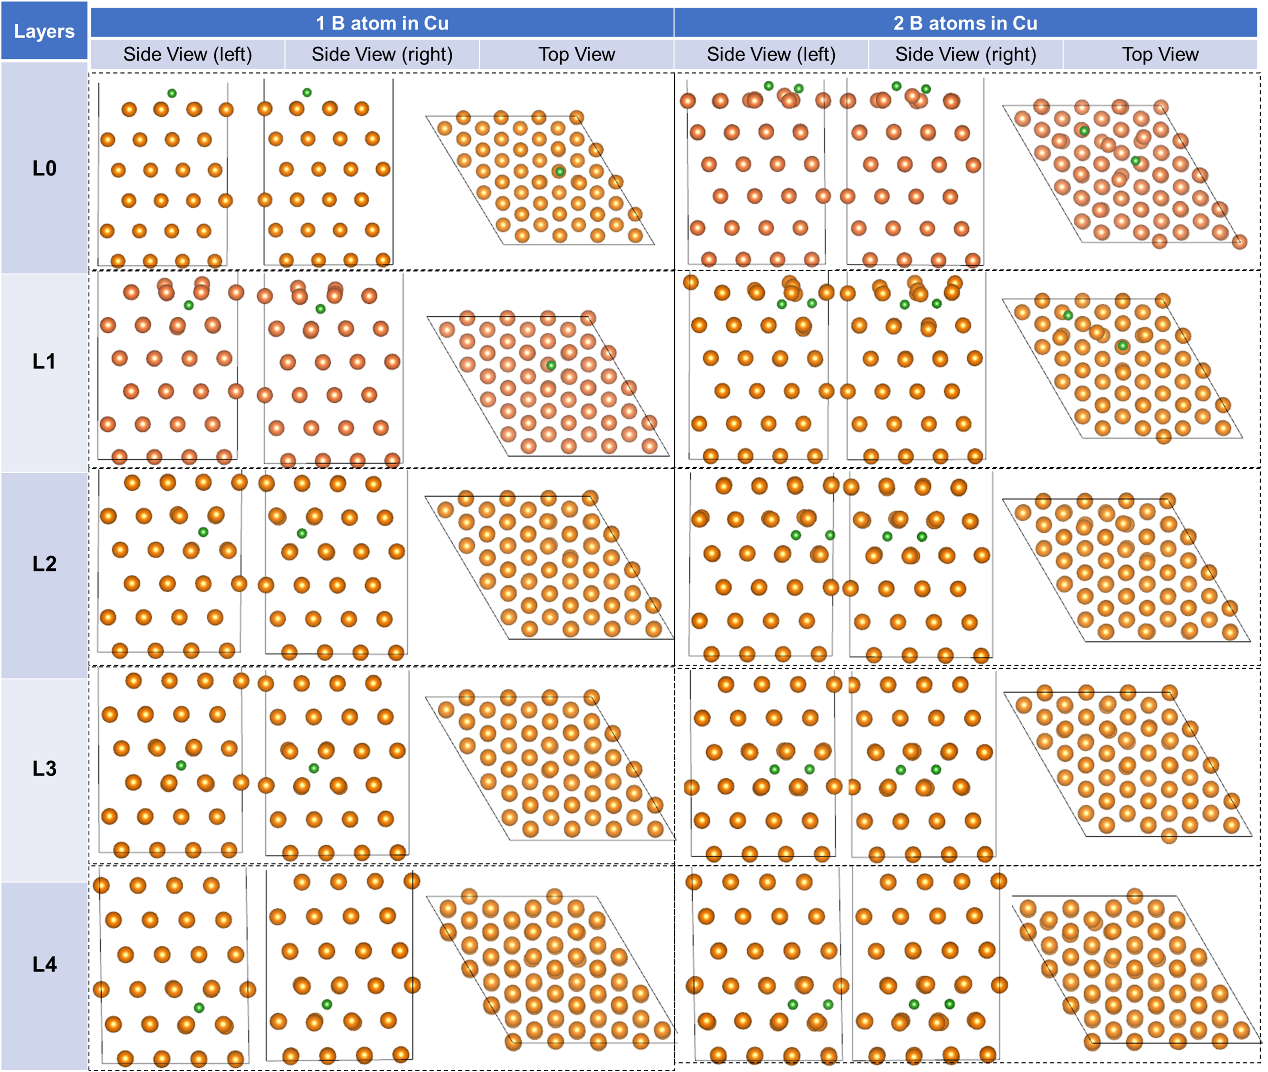
 Figure S20. Conformations of 1 B atom and 2 B atoms in different layers of the Cu crystalline phase.


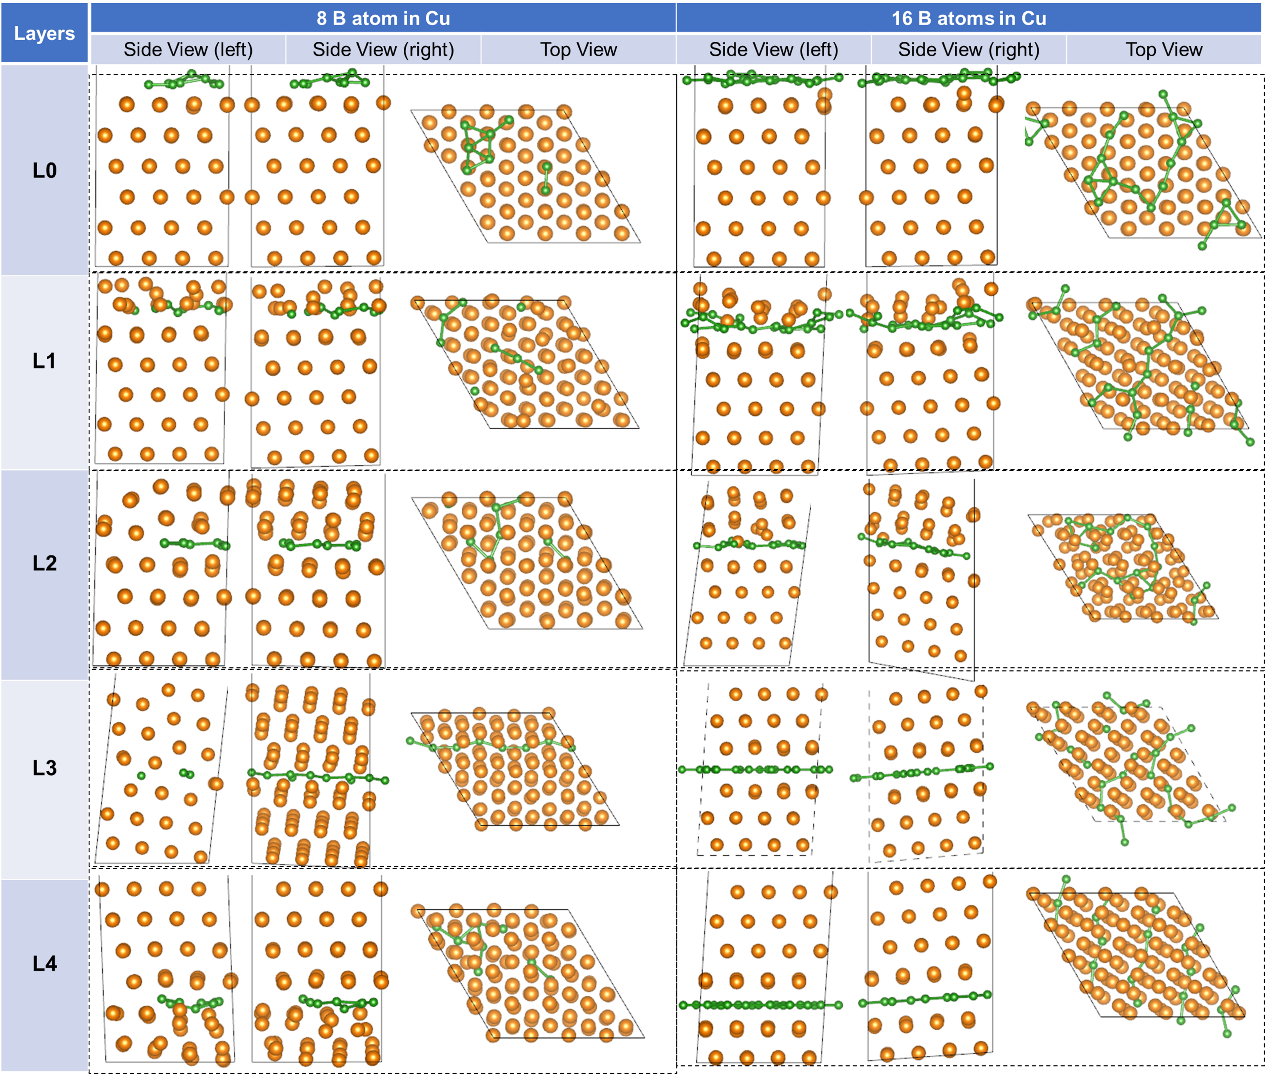
Figure S21. Configurations of 8 B atom and 16 B atoms in different layers of the Cu crystalline phase.


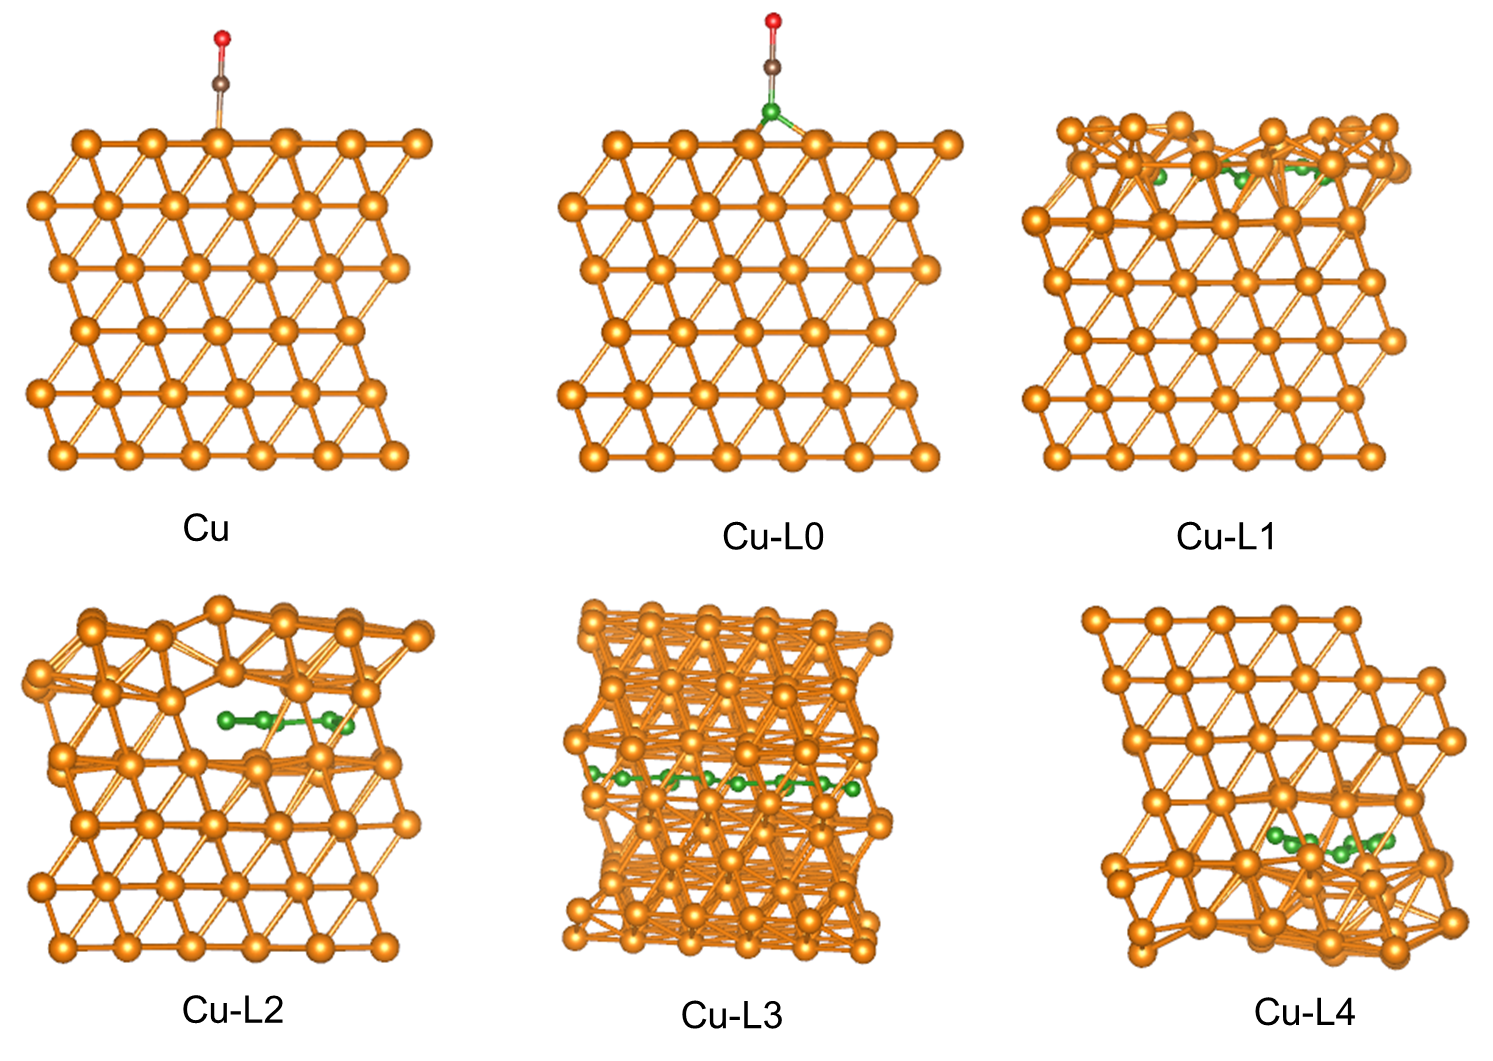


Figure S22. Catalytic configuration for calculating the adsorption energy of *CO.

Table S1 B contents in samples synthesized using different amount of CuCl2.

| Samples | CuB1 | CuB2 | CuB3 | CuB4 | CuB5 |
| --- | --- | --- | --- | --- | --- |
| CuCl2 | 400 | 300 | 200 | 100 | 50 |
| B/Cu (wt %) | 1.07 | 1.20 | 2.03 | 2.30 | 3.12 |

Table S2 Curvefit Parametesa for Cu K-edge EXAFS for CuB2 standards.

| Path | *d*b/Å | *N* | *R* (ΔR) / Å | σ2/ Å2 |
| --- | --- | --- | --- | --- |
| [Cu]Cu-Cu1 | 2.556 | 8.0(±1) | 2.58(0.02) | 0.017 |
| [Cu2O]Cu-O1 | 1.841 | 4c | 1.90(0.06) | 0.00618 |
| [CuO]Cu-O2 | 1.947 | 4c | 2.00(0.05) | 0.00618 |
| [CuO]Cu-O3 | 2.766 | 2c | 2.83(0.07) | 0.00662 |
| [CuO]Cu-Cu2 | 2.884 | 4c | 2.87(-0.01) | 0.00662 |
| [CuO]Cu-Cu3 | 3.158 | 2c | 3.10(-0.06) | 0.00618 |

a S02 was fixed as 0.92 (From the same experimental group of Cu standard sample). Δ*E*0 was refined as a segregate fit parameter, returning a value of (-2 ± 1) eV for Cu2O, (6 ± 1) eV for CuO. Data ranges: 2 ≤ k ≤ 12 Å-1, 1.0 < R < 3.0 Å. The number of variable parameters is 12, out of a total of 12.43 independent data points. R factor for this fit is 3.0%. b The distances for Cu-O and Cu-Cu are from the crystal structure of Cu, Cu2O and CuO. c These coordination numbers were constrained as *N*(Cu – O) and *N*(Cu – Cu) based on the crystal structure. d The Debye-Waller factors were constrained as σ2(Cu-O1) = σ2(Cu-O2) = σ2(Cu-Cu3) and σ2(Cu-O3) = σ2(Cu-Cu2) for decreasing the correlation (or reducing the number of variables)

Table S3. Curvefit Parametersa for Cu K-edge EXAFS for CuB5 standards

| Path | *d*b/Å | *N* | *R* (ΔR) / Å | σ2/ Å2 |
| --- | --- | --- | --- | --- |
| [Cu2O]Cu-O | 1.841 | 4c | 1.93(0.09) | 0.009 |
| [CuO]Cu-O1 | 1.947 | 4c | 2.04(0.09) | 0.006 |
| [CuO]Cu-Cu1 | 2.884 | 3.2(±0.6) | 2.82(-0.06) | 0.005 |

a S02 was fixed as 0.92 (From the same experimental group of Cu standard sample). Δ*E*0 was refined as a segregate fit parameter, returning a value of (9 ± 1) eV for Cu2O, (7 ± 1) eV for CuO. Data ranges: 3 ≤ k ≤ 12 Å-1, 1.0 < R < 3.0 Å. The number of variable parameters is 9, out of a total of 11.25 independent data points. R factor for this fit is 4.7%. b The distances for Cu-O and Cu-Cu1 are from the crystal structure of Cu2O and CuO. c These coordination numbers were constrained as *N*(Cu – O1) = 4 and *N*(Cu – O2) = 4 based on the crystal structure.
